# Supplementary material for: Large Scale RNAi Reveals the Requirement of Nuclear Envelope Breakdown for Nuclear Import of Human Papillomaviruses
Source: PLoS Pathog. 2014 May 29;10(5):e1004162. doi: 10.1371/journal.ppat.1004162 (PMC4038628; doi:10.1371/journal.ppat.1004162)
Supplement: Table S1 — List of validated host factors involved in HPV16 infection. Each of the 162 identified host factors is annotated with a link to their corresponding NCBI Gene pages, as well as their entries from several common gene and protein annotation databases, including GO, and PANTHER. The 162 factors confirmed in the rescreen (Y) are marked in green, not confirmed (N) in black, and factors not included in the secondary screen are marked red. The information is separated according to the effect on HPV16 infection upon RNAi of the respective gene, i.e. enhanced and reduced infection (Tabs 1–2). (XLSX) [file ppat.1004162.s010.xlsx]

## Sheet: enhanced infection
Entrez_Gene_Id	Gene_Symbol	Gene_Name	Confirmed in rescreen (Y/N)	GO_Process	GO_Function	GO_Component	Panther_Family	Panther_Sub_Family	Panther_Molecular_Function_1
3832	KIF11	kinesin family member 11	Y	microtubule-based movement|cell cycle|mitotic spindle organization and biogenesis|mitosis|mitotic centrosome separation|spindle pole body organization and biogenesis|cell division	nucleotide binding|microtubule motor activity|ATP binding	spindle pole|kinesin complex|spindle microtubule	KINESIN HEAVY CHAIN	KINESIN EG-5	Cytoskeletal protein >Microtubule family cytoskeletal protein >Microtubule binding motor protein.	Signal transduction >Intracellular signaling cascade. Intracellular protein traffic >Endocytosis >Receptor mediated endocytosis. Intracellular protein traffic >General vesicle transport.
114132	SIGLEC11	sialic acid binding Ig-like lectin 11	N	cell adhesion	protein binding|sugar binding	membrane|integral to membrane	SIALIC ACID BINDING IMMUNOGLOBULIN-LIKE LECTIN	SIALIC ACID BINDING IG-LIKE LECTIN	Receptor >Immunoglobulin receptor family member. Signaling molecule >Membrane-bound signaling molecule. Cell adhesion molecule >Other cell adhesion molecule. Defense/immunity protein >Immunoglobulin receptor family member.	Apoptosis >Induction of apoptosis.
200909	HTR3D	5-hydroxytryptamine (serotonin) receptor 3 family member D	N	ion transport	extracellular ligand-gated ion channel activity|neurotransmitter receptor activity	integral to membrane|postsynaptic membrane	NEUROTRANSMITTER GATED ION CHANNEL	5-HYDROXYTRYPTAMINE SEROTONIN RECEPTOR 3C, 3D, 3E	Receptor >Ligand-gated ion channel >Other ligand-gated ion channel. Ion channel >Ligand-gated ion channel >Other ligand-gated ion channel.	Apoptosis >Apoptotic processes.
51366	UBR5	ubiquitin protein ligase E3 component n-recognin 5	Y	protein modification process|ubiquitin-dependent protein catabolic process|ubiquitin cycle|response to DNA damage stimulus|cell proliferation|progesterone receptor signaling pathway	ubiquitin-protein ligase activity|ubiquitin-protein ligase activity|protein binding|zinc ion binding|ligase activity|metal ion binding	intracellular|soluble fraction|nucleus	HECT DOMAIN UBIQUITIN-PROTEIN LIGASE	UBIQUITIN--PROTEIN LIGASE EDD/HYD	Ligase >Ubiquitin-protein ligase.	Biological process unclassified.
286355	LOC286355									Nucleoside, nucleotide and nucleic acid metabolism >mRNA transcription >mRNA transcription regulation. Cell proliferation and differentiation.
4363	ABCC1	ATP-binding cassette, sub-family C (CFTR/MRP), member 1	N	transport|transport|response to drug	nucleotide binding|transporter activity|transporter activity|ATP binding|ATP binding|ATPase activity|ATPase activity|ATPase activity, coupled to transmembrane movement of substances|ATPase activity, coupled to transmembrane movement of substances	membrane fraction|integral to plasma membrane|membrane|integral to membrane	ATP-BINDING CASSETTE TRANSPORTER	MULTIDRUG RESISTANCE PROTEIN 1 (ATP-BINDING CASSETTE C1)	Transporter >ATP-binding cassette (ABC) transporter.	Nucleoside, nucleotide and nucleic acid metabolism >DNA metabolism >DNA replication. Nucleoside, nucleotide and nucleic acid metabolism >DNA metabolism >DNA repair. Protein metabolism and modification >Protein modification >Protein phosphorylation. Signal transduction >Intracellular signaling cascade >Other intracellular signaling cascade. Cell cycle >DNA replication.
8452	CUL3	cullin 3	Y	G1/S transition of mitotic cell cycle|ubiquitin cycle|cell cycle|cell cycle arrest|positive regulation of cell proliferation|induction of apoptosis by intracellular signals	protein binding		CULLIN	CULLIN 3	Molecular function unclassified.	Signal transduction >Cell communication >Ligand-mediated signaling.
388489	LOC388489									Signal transduction.
7849	PAX8	paired box 8		transcription|multicellular organismal development|anatomical structure morphogenesis|cell differentiation|positive regulation of transcription, DNA-dependent	transcription factor activity|thyroid-stimulating hormone receptor activity|protein binding|transcription activator activity	nucleus|nucleoplasm	HOMEOBOX PROTEIN	PAIRED BOX PROTEIN PAX-8	Transcription factor >Homeobox transcription factor. Nucleic acid binding >Other DNA-binding protein.	Protein metabolism and modification >Proteolysis.
3624	INHBA	inhibin, beta A	N	G1/S transition of mitotic cell cycle|skeletal development|ovarian follicle development|induction of apoptosis|defense response|cell cycle arrest|cell surface receptor linked signal transduction|cell-cell signaling|nervous system development|response to external stimulus|cell differentiation|erythrocyte differentiation|negative regulation of cell growth|regulation of activin receptor signaling pa…	cytokine activity|transforming growth factor beta receptor binding|hormone activity|growth factor activity|activin inhibitor activity|identical protein binding|follistatin binding	extracellular region|activin A complex|inhibin A complex	TGF-BETA FAMILY	INHIBIN BETA A, INHBA	Signaling molecule >Growth factor.	Nucleoside, nucleotide and nucleic acid metabolism >mRNA transcription >mRNA transcription regulation.
26033	ATRNL1	attractin-like 1	N	multicellular organismal development	receptor activity|sugar binding	membrane	LAMININ	ATTRACTIN	Signaling molecule >Other signaling molecule.	Transport >Ion transport >Cation transport.
1132	CHRM4	cholinergic receptor, muscarinic 4	N	acetylcholine receptor signaling, muscarinic pathway|cell proliferation	rhodopsin-like receptor activity|receptor activity|muscarinic acetylcholine receptor activity	plasma membrane|integral to plasma membrane|cell junction|synapse	G-PROTEIN COUPLED RECEPTOR	MUSCARINIC ACETYLCHOLINE RECEPTOR M4	Receptor >G-protein coupled receptor.	Lipid, fatty acid and steroid metabolism >Steroid metabolism >Cholesterol metabolism. Lipid, fatty acid and steroid metabolism >Steroid metabolism >Steroid hormone metabolism. Electron transport.
54434	SSH1	slingshot homolog 1 (Drosophila)	N	cell morphogenesis|protein amino acid dephosphorylation|actin cytoskeleton organization and biogenesis	actin binding|protein tyrosine phosphatase activity|protein binding|protein tyrosine/serine/threonine phosphatase activity|hydrolase activity	cytoplasm|cytoskeleton|plasma membrane|cell projection	DUAL SPECIFICITY PROTEIN PHOSPHATASE	SLINGSHOT DUAL SPECIFICITY PHOSPHATASE	Phosphatase >Protein phosphatase.	Signal transduction >Cell surface receptor mediated signal transduction >G-protein mediated signaling.
54407	SLC38A2	solute carrier family 38, member 2	Y				AMINO ACID TRANSPORTER		Molecular function unclassified.	Protein metabolism and modification >Proteolysis.
3780	KCNN1	potassium intermediate/small conductance calcium-activated channel, subfamily N, member 1	N	ion transport|potassium ion transport|synaptic transmission	ion channel activity|calmodulin binding|small conductance calcium-activated potassium channel activity	membrane fraction|voltage-gated potassium channel complex|membrane|integral to membrane	CALCIUM-ACTIVATED POTASSIUM CHANNEL	CALCIUM-ACTIVATED POTASSIUM CHANNEL 1 (SK1)	Ion channel >Voltage-gated ion channel >Voltage-gated potassium channel.
160065	PATE1	expressed in prostate and testis	Y	phospholipid metabolic process|lipid catabolic process	phospholipase A2 activity		URINARY PROTEIN (RUP)/ACROSOMAL PROTEIN SP-10		Miscellaneous function >Other miscellaneous function protein.	Coenzyme and prosthetic group metabolism.
140885	SIRPA	signal-regulatory protein alpha	N	cell adhesion		plasma membrane|integral to membrane	TYROSINE PROTEIN PHOSPHATASE		Signaling molecule >Chemokine.	Protein metabolism and modification >Proteolysis.
2271	FH	fumarate hydratase	N	tricarboxylic acid cycle|fumarate metabolic process|cell cycle|negative regulation of progression through cell cycle	fumarate hydratase activity|lyase activity	cytoplasm|mitochondrion|tricarboxylic acid cycle enzyme complex	ASPARTATEAMMONIA/ARGININOSUCCINATE/ADENYLOSUCCINATE LYASE	ASPARTATE AMMONIA LYASE	Lyase >Other lyase.	Signal transduction >Cell surface receptor mediated signal transduction >Other receptor mediated signaling pathway. Developmental processes. Cell proliferation and differentiation.
9230	RAB11B	RAB11B, member RAS oncogene family	N	small GTPase mediated signal transduction|protein transport	nucleotide binding|GTPase activity|GTP binding	membrane	RAS-RELATED GTPASE	RAS-RELATED PROTEIN RAB-11	Select regulatory molecule >G-protein >Small GTPase.	Cell structure and motility >Cell motility.
1149	CIDEA	cell death-inducing DFFA-like effector a	Y	DNA fragmentation during apoptosis|lipid metabolic process|apoptosis|DNA damage response, signal transduction resulting in induction of apoptosis	protein binding	intracellular|mitochondrion|mitochondrial envelope	CELL DEATH ACTIVATOR CIDE	CELL DEATH ACTIVATOR CIDE-A	Miscellaneous function >Other miscellaneous function protein.	Intracellular protein traffic. Cell cycle >Mitosis >Chromosome segregation. Cell structure and motility >Cell structure. Cell structure and motility >Cell motility.
7917	BAT3	HLA-B associated transcript 3	N	protein modification process	protein binding		SCYTHE/BAT3		Select regulatory molecule.	Intracellular protein traffic >General vesicle transport. Protein targeting and localization.
51433	ANAPC5	anaphase promoting complex subunit 5	Y	regulation of progression through cell cycle|G2/M transition of mitotic cell cycle|mitotic anaphase|ubiquitin-dependent protein catabolic process|ubiquitin cycle|cell cycle|cell division	ubiquitin-protein ligase activity|binding	anaphase-promoting complex	FAMILY NOT NAMED	SUBFAMILY NOT NAMED	Molecular function unclassified.	Nucleoside, nucleotide and nucleic acid metabolism >mRNA transcription >mRNA transcription regulation.
80095	ZNF606	zinc finger protein 606		transcription|regulation of transcription, DNA-dependent	DNA binding|zinc ion binding|metal ion binding	intracellular	ZINC FINGER PROTEINS	KRUEPPEL C2H2-TYPE ZINC FINGER	Transcription factor >Zinc finger transcription factor >KRAB box transcription factor.	Signal transduction. Protein targeting and localization >Protein targeting.
9874	TLK1	tousled-like kinase 1	N	regulation of chromatin assembly or disassembly|protein amino acid phosphorylation|protein amino acid phosphorylation|intracellular protein transport|response to DNA damage stimulus|cell cycle|intracellular signaling cascade|chromatin modification	nucleotide binding|protein serine/threonine kinase activity|protein serine/threonine kinase activity|protein serine/threonine kinase activity|protein binding|ATP binding|ATP binding|transferase activity	cellular_component|nucleus|nucleus	MIXED LINEAGE PROTEIN KINASE	TOUSLED-LIKE KINASE	Kinase >Protein kinase >Non-receptor serine/threonine protein kinase.	Protein metabolism and modification >Protein modification >Protein phosphorylation. Cell cycle >Mitosis >Cytokinesis.
5367	PMCH	pro-melanin-concentrating hormone	N	signal transduction|neuropeptide signaling pathway|synaptic transmission|multicellular organismal development|spermatogenesis|feeding behavior|cell differentiation	melanin-concentrating hormone activity	extracellular region	MELANIN-CONCENTRATING HORMONE		Signaling molecule >Peptide hormone >Neuropeptide.	Signal transduction >Cell communication >Ligand-mediated signaling. Transport >Ion transport >Anion transport. Neuronal activities >Synaptic transmission >Nerve-nerve synaptic transmission.
2700	GJA3	gap junction protein, alpha 3, 46kDa	N	transport|cell-cell signaling|visual perception		integral to plasma membrane|connexon complex|membrane|cell junction	CONNEXIN	GAP JUNCTION ALPHA-3 PROTEIN (CONNEXIN 46)	Cell junction protein >Gap junction.	Transport >Ion transport >Cation transport. Blood circulation and gas exchange.
9781	RNF144A	ring finger protein 144A	N	ubiquitin cycle	protein binding|zinc ion binding|metal ion binding	Golgi apparatus	ARIADNE RING ZINC FINGER	UBIQUITIN CONJUGATING ENZYME 7 INTERACTING PROTEIN 4	Ligase >Ubiquitin-protein ligase.	Developmental processes >Gametogenesis >Spermatogenesis and motility. Cell cycle >Cell cycle control. Oncogenesis.
5309	PITX3	paired-like homeodomain 3		regulation of transcription, DNA-dependent|multicellular organismal development|organ morphogenesis|midbrain development|neuron development	transcription factor activity|sequence-specific DNA binding	nucleus	HOMEOBOX PROTEIN	PITUITARY HOMEOBOX PROTEIN 1, 2, 3	Transcription factor >Homeobox transcription factor. Nucleic acid binding >Other DNA-binding protein.	Signal transduction >Intracellular signaling cascade. Intracellular protein traffic >Endocytosis >Receptor mediated endocytosis. Intracellular protein traffic >General vesicle transport.
1139	CHRNA7	cholinergic receptor, nicotinic, alpha 7	N	activation of MAPK activity|ion transport|signal transduction|synaptic transmission|negative regulation of tumor necrosis factor production	nicotinic acetylcholine-activated cation-selective channel activity|ion channel activity|extracellular ligand-gated ion channel activity|protein binding|acetylcholine receptor activity|neurotransmitter receptor activity	plasma membrane|nicotinic acetylcholine-gated receptor-channel complex|integral to membrane|cell junction|synapse|postsynaptic membrane	NEUROTRANSMITTER GATED ION CHANNEL	NICOTINIC ACETYLCHOLINE RECEPTOR ALPHA 7	Receptor >Ligand-gated ion channel >Acetylcholine receptor. Ion channel >Ligand-gated ion channel >Acetylcholine receptor.	Transport >Ion transport >Cation transport. Sensory perception >Chemosensory perception >Taste. Blood circulation and gas exchange >Regulation of vasoconstriction, dilation.
1583	CYP11A1	cytochrome P450, family 11, subfamily A, polypeptide 1	N	electron transport|lipid metabolic process|C21-steroid hormone biosynthetic process|androgen biosynthetic process|steroid metabolic process|cholesterol metabolic process	monooxygenase activity|iron ion binding|cholesterol monooxygenase (side-chain-cleaving) activity|oxygen binding|heme binding|metal ion binding	mitochondrion|membrane	CYTOCHROME P450	CYTOCHROME P450, SUBFAMILY 11A1	Oxidoreductase >Oxygenase.	Protein metabolism and modification >Proteolysis. Developmental processes >Fertilization.
2863	GPR39	G protein-coupled receptor 39	N	signal transduction|G-protein coupled receptor protein signaling pathway	rhodopsin-like receptor activity|receptor activity	integral to plasma membrane|membrane	G-PROTEIN COUPLED RECEPTOR	G-PROTEIN RECEPTOR GPR39	Receptor >G-protein coupled receptor.	Biological process unclassified.
51317	PHF21A	PHD finger protein 21A	N	transcription|regulation of transcription, DNA-dependent|chromatin modification	protein binding|zinc ion binding|metal ion binding	histone deacetylase complex	RING FINGER-CONTAINING PROTEIN-RELATED	RING FINGER-CONTAINING	Ligase >Ubiquitin-protein ligase.	Signal transduction >Cell communication. Transport >Ion transport >Cation transport. Neuronal activities >Synaptic transmission >Neuromuscular synaptic transmission. Muscle contraction.
92755	LOC92755	hypothetical gene LOC92755	N							Carbohydrate metabolism. Electron transport >Oxidative phosphorylation.
4524	MTHFR	5,10-methylenetetrahydrofolate reductase (NADPH)	N	amino acid metabolic process|methionine metabolic process|circulation|methionine biosynthetic process	methylenetetrahydrofolate reductase (NADPH) activity|methylenetetrahydrofolate reductase (NADPH) activity|protein binding|oxidoreductase activity		METHYLTETRAHYDROFOLATE:HOMOCYSTEINE METHYLTRANSFERASE RELATED	METHYLENETETRAHYDROFOLATE REDUCTASE	Oxidoreductase >Reductase.	Protein metabolism and modification >Protein modification >Protein phosphorylation. Cell structure and motility >Cell structure.
6906	SERPINA7	serpin peptidase inhibitor, clade A (alpha-1 antiproteinase, antitrypsin), member 7	Y		serine-type endopeptidase inhibitor activity|binding	extracellular region|extracellular space	SERINE PROTEASE INHIBITOR, SERPIN	THYROXINE-BINDING GLOBULIN	Select regulatory molecule >Protease inhibitor >Serine protease inhibitor.	Biological process unclassified.
7040	TGFB1	transforming growth factor, beta 1	Y	skeletal development|epithelial to mesenchymal transition|protein amino acid phosphorylation|inflammatory response|transforming growth factor beta receptor signaling pathway|cell death|positive regulation of cell proliferation|negative regulation of cell proliferation|germ cell migration|organ morphogenesis|cell growth|regulation of striated muscle development|negative regulation of transcription…	transforming growth factor beta receptor binding|protein binding|growth factor activity|transcription activator activity	proteinaceous extracellular matrix|extracellular space	TGF-BETA FAMILY	TRANSFORMING GROWTH FACTOR BETA 1, TGFB1	Signaling molecule >Growth factor.
1730	DIAPH2	diaphanous homolog 2 (Drosophila)	Y	cytokinesis|multicellular organismal development|cellular component organization and biogenesis|actin cytoskeleton organization and biogenesis|cell differentiation|oogenesis	actin binding|receptor binding|Rho GTPase binding	cytoplasm|endosome	FORMIN-RELATED	DIAPHANOUS HOMOLOG 2	Cytoskeletal protein >Actin binding cytoskeletal protein >Non-motor actin binding protein.	Signal transduction >Cell surface receptor mediated signal transduction. Signal transduction >Intracellular signaling cascade. Homeostasis.
7283	TUBG1	tubulin, gamma 1	Y	meiotic spindle organization and biogenesis|microtubule cytoskeleton organization and biogenesis|protein polymerization	nucleotide binding|GTPase activity|structural constituent of cytoskeleton|protein binding|GTP binding	pericentriolar material|condensed nuclear chromosome|gamma-tubulin complex|cytoplasm|cytoplasm|spindle pole body|polar microtubule|cytoplasmic microtubule	TUBULIN	TUBULIN GAMMA CHAIN	Cytoskeletal protein >Microtubule family cytoskeletal protein >Tubulin.	Signal transduction >Cell communication >Ligand-mediated signaling. Cell adhesion. Apoptosis >Induction of apoptosis. Developmental processes >Ectoderm development >Neurogenesis. Cell cycle >Cell cycle control. Cell proliferation and differentiation. Oncogenesis >Tumor suppressor. Cell structure and motility >Cell motility.
8676	STX11	syntaxin 11	N	intracellular protein transport|membrane fusion|vesicle-mediated transport	SNAP receptor activity|protein transporter activity	membrane	SYNTAXIN	SYNTAXIN 11	Membrane traffic protein >SNARE protein.
64344	HIF3A	hypoxia inducible factor 3, alpha subunit		regulation of transcription, DNA-dependent|signal transduction	DNA binding|signal transducer activity|transcription regulator activity	nucleus|cytoplasm	HYPOXIA-INDUCIBLE FACTOR 1 ALPHA	HYPOXIA-INDUCIBLE FACTOR 3 ALPHA, HIF-3 ALPHA	Transcription factor >Basic helix-loop-helix transcription factor. Nucleic acid binding.	Biological process unclassified.
10399	GNB2L1	guanine nucleotide binding protein (G protein), beta polypeptide 2-like 1	Y		receptor binding	cytoplasm|cell soma	RECEPTOR FOR ACTIVATED PROTEIN KINASE C (RACK1)		Miscellaneous function >Other miscellaneous function protein.	Intracellular protein traffic. Protein targeting and localization.
9212	AURKB	aurora kinase B	Y	protein amino acid phosphorylation|cell cycle|mitosis|cell division	nucleotide binding|protein serine/threonine kinase activity|protein binding|ATP binding|transferase activity	chromosome, pericentric region|chromosome	CALCIUM/CALMODULIN-DEPENDENT PROTEIN KINASE-RELATED	AURORA KINASE-RELATED	Kinase >Protein kinase >Non-receptor serine/threonine protein kinase.	Signal transduction >Cell communication >Ligand-mediated signaling. Transport >Ion transport >Anion transport. Neuronal activities >Synaptic transmission >Nerve-nerve synaptic transmission.
2563	GABRD	gamma-aminobutyric acid (GABA) A receptor, delta	N	ion transport|signal transduction	GABA-A receptor activity|ion channel activity|extracellular ligand-gated ion channel activity|chloride channel activity|neurotransmitter receptor activity|chloride ion binding	integral to plasma membrane|cell junction|synapse|postsynaptic membrane	NEUROTRANSMITTER GATED ION CHANNEL	GAMMA-AMINOBUTYRIC-ACID RECEPTOR A DELTA SUBUNIT (GABA A DELTA)	Receptor >Ligand-gated ion channel >GABA receptor. Ion channel >Ligand-gated ion channel >GABA receptor.	Intracellular protein traffic >General vesicle transport. Developmental processes >Gametogenesis. Developmental processes >Fertilization. Cell cycle >Mitosis >Chromosome segregation. Cell proliferation and differentiation. Cell structure and motility >Cell structure.
93107	KCNG4	potassium voltage-gated channel, subfamily G, member 4	N	ion transport|potassium ion transport	voltage-gated ion channel activity|voltage-gated potassium channel activity|protein binding|potassium ion binding	voltage-gated potassium channel complex|membrane|integral to membrane	VOLTAGE-GATED POTASSIUM CHANNEL	VOLTAGE-GATED POTASSIUM CHANNEL PROTEIN KV6	Ion channel >Voltage-gated ion channel >Voltage-gated potassium channel.	Sensory perception >Hearing. Developmental processes >Ectoderm development >Neurogenesis.
890	CCNA2	cyclin A2	Y	regulation of cyclin-dependent protein kinase activity|cell cycle|mitosis|mitotic cell cycle G2/M transition DNA damage checkpoint|positive regulation of transcription|cell division	protein binding	female pronucleus|male pronucleus|nucleus|cytoplasm	CYCLINS	CYCLIN A	Select regulatory molecule >Kinase modulator >Kinase activator.	Signal transduction >Cell surface receptor mediated signal transduction >Other receptor mediated signaling pathway. Signal transduction >Cell communication. Transport >Ion transport >Cation transport. Neuronal activities >Synaptic transmission >Nerve-nerve synaptic transmission.
9364	RAB28	RAB28, member RAS oncogene family	N	small GTPase mediated signal transduction	nucleotide binding|GTPase activity|GTP binding	membrane	RAS-RELATED GTPASE	RAS-RELATED PROTEIN RAB-28	Select regulatory molecule >G-protein >Small GTPase.	Nucleoside, nucleotide and nucleic acid metabolism >mRNA transcription >mRNA transcription regulation. Signal transduction >Intracellular signaling cascade >JNK cascade. Cell cycle >Cell cycle control. Cell proliferation and differentiation. Oncogenesis >Oncogene.
6338	SCNN1B	sodium channel, nonvoltage-gated 1, beta (Liddle syndrome)	Y	ion transport|sodium ion transport|excretion|response to stimulus	ion channel activity|protein binding|amiloride-sensitive sodium channel activity|sodium ion binding	membrane fraction|integral to plasma membrane|membrane	AMILORIDE-SENSITIVE SODIUM CHANNEL-RELATED	AMILORIDE-SENSITIVE SODIUM CHANNEL BETA-SUBUNIT	Ion channel >Other ion channel.	Signal transduction >Cell surface receptor mediated signal transduction >G-protein mediated signaling. Immunity and defense >Blood clotting. Blood circulation and gas exchange >Regulation of vasoconstriction, dilation. Cell structure and motility >Cell motility.
49	ACR	acrosin	N	acrosome matrix dispersal|adenylate cyclase activation|penetration of zona pellucida	DNA binding|amidase activity|acrosin activity|copper ion binding|protein binding|protein binding|mannose binding|drug binding|peptidase activity|zinc ion binding|fucose binding	acrosomal matrix|protein complex	SERINE PROTEASE-RELATED	ACROSIN	Protease >Serine protease.	Signal transduction >Cell communication. Transport >Ion transport >Cation transport. Neuronal activities >Synaptic transmission >Nerve-nerve synaptic transmission.
5775	PTPN4	protein tyrosine phosphatase, non-receptor type 4 (megakaryocyte)	N	protein amino acid dephosphorylation	non-membrane spanning protein tyrosine phosphatase activity|structural molecule activity|cytoskeletal protein binding|hydrolase activity	cytoplasm|cytoskeleton|extrinsic to membrane	PROTEIN-TYROSINE PHOSPHATASE	gb def: Mus musculus 4 days neonate male adipose cDNA, RIKEN full-length enriched librar	Molecular function unclassified.	Transport >Ion transport >Cation transport. Homeostasis.
1146	CHRNG	cholinergic receptor, nicotinic, gamma	N	ion transport|muscle contraction|signal transduction	nicotinic acetylcholine-activated cation-selective channel activity|muscarinic acetylcholine receptor activity|ion channel activity|extracellular ligand-gated ion channel activity|channel activity|neurotransmitter receptor activity	Golgi apparatus|plasma membrane|integral to plasma membrane|integral to membrane|cell junction|synapse|postsynaptic membrane	NEUROTRANSMITTER GATED ION CHANNEL	ACETYLCHOLINE RECEPTOR PROTEIN, GAMMA CHAIN	Receptor >Ligand-gated ion channel >Acetylcholine receptor. Ion channel >Ligand-gated ion channel >Acetylcholine receptor. Transporter >Cation transporter.	Protein metabolism and modification >Protein folding. Protein metabolism and modification >Protein complex assembly.
6389	SDHA	succinate dehydrogenase complex, subunit A, flavoprotein (Fp)	N	tricarboxylic acid cycle|tricarboxylic acid cycle|electron transport|electron transport|transport|DNA integration	succinate dehydrogenase activity|DNA binding|ribonuclease H activity|succinate dehydrogenase (ubiquinone) activity|zinc ion binding|integrase activity|oxidoreductase activity, acting on the CH-CH group of donors|FAD binding	mitochondrion|mitochondrial respiratory chain complex II|membrane	SUCCINATE DEHYDROGENASE 2 FLAVOPROTEIN SUBUNIT	SUCCINATE DEHYDROGENASE 2 FLAVOPROTEIN SUBUNIT	Oxidoreductase >Dehydrogenase.
4139	MARK1	MAP/microtubule affinity-regulating kinase 1	N	protein amino acid phosphorylation|cytoskeleton organization and biogenesis|protein kinase cascade	nucleotide binding|magnesium ion binding|protein serine/threonine kinase activity|ATP binding|transferase activity	cytoplasm|microtubule cytoskeleton	CALCIUM/CALMODULIN-DEPENDENT PROTEIN KINASE-RELATED	MAP/MICROTUBULE AFFINITY-REGULATING KINASE 2,4	Cytoskeletal protein >Microtubule family cytoskeletal protein >Non-motor microtubule binding protein. Kinase >Protein kinase >Non-receptor serine/threonine protein kinase.	Lipid, fatty acid and steroid metabolism >Lipid and fatty acid transport. Lipid, fatty acid and steroid metabolism >Phospholipid metabolism. Lipid, fatty acid and steroid metabolism >Steroid metabolism >Cholesterol metabolism. Transport >Lipid and fatty acid transport.
83860	TAF3	TAF3 RNA polymerase II, TATA box binding protein (TBP)-associated factor, 140kDa		transcription|regulation of transcription, DNA-dependent|maintenance of protein localization in nucleus	protein binding|zinc ion binding|metal ion binding	nucleus	No PANTHER hit		Molecular function unclassified.	Nucleoside, nucleotide and nucleic acid metabolism. Developmental processes >Mesoderm development >Muscle development. Cell proliferation and differentiation.
143497	LOC143497		N							Cell cycle >Mitosis >Chromosome segregation.
80176	SPSB1	splA/ryanodine receptor domain and SOCS box containing 1	N	intracellular signaling cascade		cytoplasm	SPRY DOMAIN CONTAINING SOCS BOX PROTEIN		Molecular function unclassified.	Signal transduction >Cell surface receptor mediated signal transduction >G-protein mediated signaling. Muscle contraction. Apoptosis. Developmental processes. Cell proliferation and differentiation. Cell structure and motility >Cell motility.
1630	DCC	deleted in colorectal carcinoma	N	neuron migration|apoptosis|induction of apoptosis|cell cycle|multicellular organismal development|axonogenesis|negative regulation of progression through cell cycle	transmembrane receptor activity|protein binding	integral to plasma membrane|membrane|axon	CELL ADHESION MOLECULE	NEOGENIN	Receptor >Other receptor. Cell adhesion molecule >CAM family adhesion molecule.	Intracellular protein traffic >Peroxisome transport.
392265	LOC392265	similar to Cell division protein kinase 5 (Tau protein kinase II catalytic subunit) (TPKII catalytic subunit) (Serine/threonine-protein kinase PSSALRE)	Y							Cell adhesion. Developmental processes >Fertilization.
6059	ABCE1	ATP-binding cassette, sub-family E (OABP), member 1	Y	electron transport|RNA catabolic process|protein folding|response to virus	nucleotide binding|ATP binding|ribonuclease inhibitor activity|electron carrier activity|ATPase activity|iron-sulfur cluster binding	cytoplasm|mitochondrion	ATP-BINDING TRANSPORT PROTEIN-RELATED	ATP-BINDING CASSETTE, SUB-FAMILY E (OABP), MEMBER 1	Molecular function unclassified.	Cell cycle >Mitosis.
81930	KIF18A	kinesin family member 18A	Y	microtubule-based movement|protein transport	nucleotide binding|microtubule motor activity|ATP binding	microtubule|microtubule associated complex	KINESIN HEAVY CHAIN	KINESIN-LIKE PROTEIN 5, 6	Cytoskeletal protein >Microtubule family cytoskeletal protein >Microtubule binding motor protein.	Biological process unclassified.
2566	GABRG2	gamma-aminobutyric acid (GABA) A receptor, gamma 2	N	ion transport|chloride transport|gamma-aminobutyric acid signaling pathway|gamma-aminobutyric acid signaling pathway|synaptic transmission	GABA-A receptor activity|ion channel activity|extracellular ligand-gated ion channel activity|chloride channel activity|protein binding|benzodiazepine receptor activity|neurotransmitter receptor activity|chloride ion binding	integral to plasma membrane|integral to membrane|cell junction|synapse|postsynaptic membrane	NEUROTRANSMITTER GATED ION CHANNEL	GAMMA-AMINOBUTYRIC-ACID RECEPTOR A GAMMA SUBUNIT 1, 2, 3, 4	Receptor >Ligand-gated ion channel >GABA receptor. Ion channel >Ligand-gated ion channel >GABA receptor.	Immunity and defense >Detoxification. Immunity and defense >Antioxidation and free radical removal.
1778	DYNC1H1	dynein, cytoplasmic 1, heavy chain 1	N	microtubule-based movement|microtubule-based movement|mitotic spindle organization and biogenesis	nucleotide binding|microtubule motor activity|microtubule motor activity|protein binding|ATP binding|ATPase activity, coupled	cytoplasm|cytoplasmic dynein complex|microtubule|dynein complex	DYNEIN HEAVY CHAIN	CYTOPLASMIC DYNEIN HEAVY CHAIN	Cytoskeletal protein >Microtubule family cytoskeletal protein >Microtubule binding motor protein. Hydrolase.	Biological process unclassified.
9445	ITM2B	integral membrane protein 2B	N	nervous system development|sensory perception of sound		membrane fraction|integral to plasma membrane|membrane	TYPE II INTERGRAL TRANSMEMBRANE PROTEIN (ITM2)	INTEGRAL TRANSMEMBRANE PROTEIN 2B	Miscellaneous function >Other miscellaneous function protein.	Signal transduction >Intracellular signaling cascade.
2905	GRIN2C	glutamate receptor, ionotropic, N-methyl D-aspartate 2C	N	ion transport|glutamate signaling pathway|regulation of synaptic plasticity	magnesium ion binding|receptor activity|ionotropic glutamate receptor activity|N-methyl-D-aspartate selective glutamate receptor activity|ion channel activity|extracellular-glutamate-gated ion channel activity|calcium ion binding	integral to plasma membrane|membrane|integral to membrane|cell junction|synapse	IONOTROPIC GLUTAMATE RECEPTOR-RELATED	GLUTAMATE RECEPTOR, IONOTROPIC, N-METHYL D-ASPARTATE EPSILON (NMDA EPSILON)	Receptor >Ligand-gated ion channel >Glutamate receptor. Ion channel >Ligand-gated ion channel >Glutamate receptor.	Signal transduction >Intracellular signaling cascade >Calcium mediated signaling. Cell cycle. Cell proliferation and differentiation.
3725	JUN	jun oncogene	Y	regulation of progression through cell cycle|regulation of transcription, DNA-dependent|cellular process|leading edge cell differentiation|positive regulation of transcription from RNA polymerase II promoter	transcription factor activity|RNA polymerase II transcription factor activity|sequence-specific DNA binding|protein dimerization activity	nuclear chromosome|nucleus|transcription factor complex	JUN TRANSCRIPTION FACTOR-RELATED	TRANSCRIPTION FACTOR C-JUN	Transcription factor >Other transcription factor. Nucleic acid binding.	Transport >Ion transport >Cation transport. Sensory perception >Pain sensation. Sensory perception >Other sensory perception.
6915	TBXA2R	thromboxane A2 receptor	Y	muscle contraction|signal transduction|G-protein coupled receptor protein signaling pathway|G-protein coupled receptor protein signaling pathway|respiratory gaseous exchange	rhodopsin-like receptor activity|receptor activity|thromboxane receptor activity|thromboxane A2 receptor activity	plasma membrane|integral to plasma membrane|integral to membrane	PROSTAGLANDIN RECEPTOR	THROMBOXANE A2 RECEPTOR	Receptor >G-protein coupled receptor.	Signal transduction >Cell surface receptor mediated signal transduction.
2901	GRIK5	glutamate receptor, ionotropic, kainate 5	N	ion transport|synaptic transmission	receptor activity|ionotropic glutamate receptor activity|ion channel activity|extracellular-glutamate-gated ion channel activity|kainate selective glutamate receptor activity	membrane|integral to membrane|integral to membrane|cell junction|synapse	IONOTROPIC GLUTAMATE RECEPTOR-RELATED	GLUTAMATE RECEPTOR, IONOTROPIC KAINATE 5	Receptor >Ligand-gated ion channel >Glutamate receptor. Ion channel >Ligand-gated ion channel >Glutamate receptor.	Nucleoside, nucleotide and nucleic acid metabolism >DNA metabolism. Nucleoside, nucleotide and nucleic acid metabolism >Chromatin packaging and remodeling. Cell cycle >Mitosis >Chromosome segregation.
10479	SLC9A6	solute carrier family 9 (sodium/hydrogen exchanger), member 6	N	ion transport|sodium ion transport|regulation of pH	antiporter activity|solute:hydrogen antiporter activity|sodium:hydrogen antiporter activity|sodium:hydrogen antiporter activity|sodium ion binding	mitochondrion|endoplasmic reticulum membrane|microsome|membrane|integral to membrane|integral to membrane	SODIUM/HYDROGEN EXCHANGER	SODIUM/HYDROGEN EXCHANGER 7, 9 (NHE7, NHE9)	Transporter >Cation transporter.	Biological process unclassified.
10694	CCT8	chaperonin containing TCP1, subunit 8 (theta)	N	protein folding	nucleotide binding|ATP binding|ATPase activity, coupled|unfolded protein binding	cytoplasm	CHAPERONIN	CHAPERONIN CONTAINING T-COMPLEX PROTEIN 1, THETA SUBUNIT, TCPQ	Chaperone >Chaperonin.	Cell cycle >Mitosis >Cytokinesis. Cell cycle >Mitosis >Chromosome segregation.
343295	LOC343295									Biological process unclassified.
19	ABCA1	ATP-binding cassette, sub-family A (ABC1), member 1	N	lipid metabolic process|transport|steroid metabolic process|cholesterol metabolic process	nucleotide binding|protein binding|ATP binding|ATP binding|anion transmembrane transporter activity|sterol transporter activity|ATPase activity	membrane fraction|integral to plasma membrane|membrane	ATP-BINDING CASSETTE TRANSPORTER SUBFAMILY A (ABCA)	ABCA1	Transporter >ATP-binding cassette (ABC) transporter.	Nucleoside, nucleotide and nucleic acid metabolism >Other nucleoside, nucleotide and nucleic acid metabolism.
4654	MYOD1	myogenic differentiation 1		regulation of transcription from RNA polymerase II promoter|protein amino acid phosphorylation|multicellular organismal development|myoblast cell fate determination|striated muscle development|cell differentiation|myoblast differentiation	RNA polymerase II transcription factor activity, enhancer binding|transcription coactivator activity|protein binding	nucleus	MYOGENIC FACTOR	MYOGENIC DETERMINING FACTOR 1, MYOD1	Transcription factor >Basic helix-loop-helix transcription factor. Nucleic acid binding.	Miscellaneous.
83540	NUF2	NUF2, NDC80 kinetochore complex component, homolog (S. cerevisiae)	Y	cell cycle|chromosome segregation|mitosis|cell division	molecular_function|protein binding	chromosome, pericentric region|chromosome, pericentric region	MEMBRALIN/KINETOCHORE PROTEIN NUF2	KINETOCHORE PROTEIN NUF2	Miscellaneous function >Structural protein.	Protein metabolism and modification >Protein modification >Protein phosphorylation.
148	ADRA1A	adrenergic, alpha-1A-, receptor	N	apoptosis|smooth muscle contraction|signal transduction|G-protein coupled receptor protein signaling pathway|protein kinase cascade|cell-cell signaling|negative regulation of cell proliferation	rhodopsin-like receptor activity|receptor activity|adrenoceptor activity|alpha1-adrenergic receptor activity|alpha1-adrenergic receptor activity	integral to plasma membrane|membrane	G-PROTEIN COUPLED RECEPTOR	ALPHA-1A AND 1C ADRENERGIC RECEPTOR	Receptor >G-protein coupled receptor.	Biological process unclassified.
5190	PEX6	peroxisomal biogenesis factor 6	N	peroxisome organization and biogenesis	nucleotide binding|ATP binding|nucleoside-triphosphatase activity|ATPase activity, coupled	cytoplasm|peroxisome|membrane	AAA-FAMILY ATPASE	PEROXISOME ASSEMBLY FACTOR-2 (PEROXISOMAL-TYPE ATPASE 1)	Molecular function unclassified.	Intracellular protein traffic. Protein targeting and localization. Developmental processes >Meiosis. Cell cycle >Mitosis >Cytokinesis. Cell cycle >Mitosis >Chromosome segregation. Cell proliferation and differentiation. Cell structure and motility >Cell structure.
7455	ZAN	zonadhesin	N	binding of sperm to zona pellucida|cell-cell adhesion	protein binding	plasma membrane|integral to membrane	EXTRACELLULAR MATRIX GLYCOPROTEIN RELATED	ZONADHESIN	Cell adhesion molecule >Other cell adhesion molecule.	Other metabolism >Other carbon metabolism.
9700	ESPL1	extra spindle pole bodies homolog 1 (S. cerevisiae)	Y	mitotic sister chromatid segregation|regulation of progression through cell cycle|meiotic spindle organization and biogenesis|cytokinesis|proteolysis|apoptosis|chromosome segregation|establishment of mitotic spindle localization|homologous chromosome segregation|positive regulation of mitotic metaphase/anaphase transition|negative regulation of sister chromatid cohesion	protein binding|cysteine-type peptidase activity	nucleus|cytoplasm|centrosome	EXTRA SPINDLE POLES 1-RELATED		Nucleic acid binding >Other nucleic acid binding.	Intracellular protein traffic >General vesicle transport.
29101	SSU72	SSU72 RNA polymerase II CTD phosphatase homolog (S. cerevisiae)					FAMILY NOT NAMED	SUBFAMILY NOT NAMED	Molecular function unclassified.	Protein metabolism and modification >Protein modification >Protein phosphorylation. Signal transduction >Intracellular signaling cascade >Other intracellular signaling cascade.
3029	HAGH	hydroxyacylglutathione hydrolase	N		hydroxyacylglutathione hydrolase activity|zinc ion binding|hydrolase activity|metal ion binding		BETA LACTAMASE DOMAIN	HYDROXYACYLGLUTATHIONE HYDROLASE	Hydrolase >Other hydrolase.	Protein metabolism and modification >Proteolysis. Cell cycle >Cell cycle control.
1173	AP2M1	adaptor-related protein complex 2, mu 1 subunit		protein complex assembly|intracellular protein transport|vesicle-mediated transport	transporter activity|protein binding|lipid binding|protein transporter activity	membrane|clathrin adaptor complex|clathrin coat of coated pit	CLATHRIN COAT ASSEMBLY PROTEIN	CLATHRIN COAT ASSOCIATED PROTEIN AP-50	Molecular function unclassified.	Signal transduction >Intracellular signaling cascade.
117286	CIB3	calcium and integrin binding family member 3	N		calcium ion binding		CALCINEURIN B	DNA-DEPENDENT PROTEIN KINASE CATALYTIC SUBUNIT-INTERACTING PROTEIN 2	Phosphatase >Protein phosphatase. Select calcium binding protein >Calmodulin related protein.	Developmental processes >Gametogenesis >Oogenesis.
1068	CETN1	centrin, EF-hand protein, 1	Y	cell cycle|mitosis|mitotic centrosome separation|cell division	calcium ion binding	centrosome|spindle pole body|cytoskeleton	CALCIUM BINDING PROTEIN	CENTRIN	Select calcium binding protein >Calmodulin related protein.	Cell cycle >Mitosis >Chromosome segregation.
40	ACCN1	amiloride-sensitive cation channel 1, neuronal (degenerin)	N	response to acid|sodium ion transport|synaptic transmission|central nervous system development|peripheral nervous system development|phototransduction|sensory perception of sound|response to mechanical stimulus|negative regulation of apoptosis|detection of mechanical stimulus during sensory perception	protein binding|amiloride-sensitive sodium channel activity|sodium ion binding	membrane fraction|integral to plasma membrane|membrane|neuron projection|cell soma	AMILORIDE-SENSITIVE SODIUM CHANNEL-RELATED	ACID SENSING ION CHANNEL 1, NEURONAL	Ion channel >Other ion channel.	Protein metabolism and modification >Protein modification >Protein phosphorylation. Signal transduction >Intracellular signaling cascade >Other intracellular signaling cascade.
2533	FYB	FYN binding protein (FYB-120/130)	N	protein amino acid phosphorylation|NLS-bearing substrate import into nucleus|immune response|signal transduction|protein kinase cascade|biological_process	receptor binding|protein binding	nucleus|cytoplasm|actin cytoskeleton	SH2 CONTAINING ADAPTOR PRAM-1 RELATED	FYN-BINDING PROTEIN	Miscellaneous function >Other miscellaneous function protein.	Protein metabolism and modification >Proteolysis. Cell cycle >Cell cycle control.
10592	SMC2	structural maintenance of chromosomes 2	Y	DNA metabolic process|cell cycle|mitosis|mitotic chromosome condensation|chromosome organization and biogenesis|cell division	nucleotide binding|protein binding|ATP binding|protein heterodimerization activity	nuclear chromosome|condensin complex|condensin complex|chromosome|cytoplasm	STRUCTURAL MAINTENANCE OF CHROMOSOMES SMC FAMILY MEMBER	STRUCTURAL MAINTENANCE OF CHROMOSOMES SMC2	Nucleic acid binding >Chromatin/chromatin-binding protein. Hydrolase.	Signal transduction >Intracellular signaling cascade.
55165	CEP55	centrosomal protein 55kDa	Y	cell cycle|mitosis|cell division			No PANTHER hit		Molecular function unclassified.	Developmental processes >Gametogenesis >Oogenesis.
3619	INCENP	inner centromere protein antigens 135/155kDa	Y	cytokinesis|cell cycle|chromosome segregation|mitosis	protein binding	central element|centric heterochromatin|spindle|microtubule|midbody|protein complex	INNER CENTROMERE PROTEIN		Nucleic acid binding >Centromere DNA-binding protein.	Cell cycle >Mitosis >Chromosome segregation.
51136	LOC51136	PTD016 protein	N		protein binding|zinc ion binding|metal ion binding		UNCHARACTERIZED RING FINGER-CONTAINING PROTEIN		Molecular function unclassified.
3192	HNRNPU	heterogeneous nuclear ribonucleoprotein U (scaffold attachment factor A)	N	mRNA processing|RNA splicing	nucleotide binding|DNA binding|RNA binding|protein binding|ATP binding	spliceosome|ribonucleoprotein complex|heterogeneous nuclear ribonucleoprotein complex	RIBONUCLEOPROTEIN	HETEROGENEOUS NUCLEAR RIBONUCLEOPROTEIN U	Nucleic acid binding >Other RNA-binding protein.
79577	CDC73	cell division cycle 73, Paf1/RNA polymerase II complex component, homolog (S. cerevisiae)	Y	transcription|cell cycle|negative regulation of progression through cell cycle	protein binding		CDC73 DOMAIN PROTEIN	HYPERPARATHYROIDISM HOMOLOG	Miscellaneous function >Other miscellaneous function protein.
84930	MASTL	microtubule associated serine/threonine kinase-like	N	protein amino acid phosphorylation	nucleotide binding|protein serine/threonine kinase activity|ATP binding|transferase activity		SERINE/THREONINE PROTEIN KINASE	SERINE/THREONINE-PROTEIN KINASE RIM15(YEAST)-RELATED	Kinase >Protein kinase >Non-receptor serine/threonine protein kinase.
10062	NR1H3	nuclear receptor subfamily 1, group H, member 3		transcription|regulation of transcription, DNA-dependent|negative regulation of transcription|cellular lipid metabolic process	transcription factor activity|steroid hormone receptor activity|transcription coactivator activity|thyroid hormone receptor activity|protein binding|zinc ion binding|sequence-specific DNA binding|metal ion binding	nucleus|nucleus	NUCLEAR HORMONE RECEPTOR	LIVER X RECEPTOR (LXR)	Receptor >Nuclear hormone receptor. Transcription factor >Nuclear hormone receptor. Nucleic acid binding.
10112	KIF20A	kinesin family member 20A	Y	microtubule-based movement|protein transport|vesicle-mediated transport	nucleotide binding|microtubule motor activity|transporter activity|ATP binding	Golgi apparatus|microtubule|microtubule associated complex	KINESIN HEAVY CHAIN	KINESIN FAMILY MEMBER 20 (RABKINESIN-6)	Cytoskeletal protein >Microtubule family cytoskeletal protein >Microtubule binding motor protein.
759	CA1	carbonic anhydrase I	N	one-carbon compound metabolic process	carbonate dehydratase activity|zinc ion binding|lyase activity|metal ion binding	cytoplasm	CARBONIC ANHYDRASE	CARBONIC ANHYDRASE I (CARBONATE DEHYDRATASE I)	Lyase >Dehydratase.
1639	DCTN1	dynactin 1 (p150, glued homolog, Drosophila)	Y	mitosis|nervous system development	motor activity|protein binding	spindle pole|cytoplasm|cytoskeleton|microtubule|dynein complex	DYNACTIN 1-RELATED MICROTUBULE-BINDING	DYNACTIN 1	Cytoskeletal protein >Microtubule family cytoskeletal protein >Non-motor microtubule binding protein.
5527	PPP2R5C	protein phosphatase 2, regulatory subunit B', gamma isoform	N	signal transduction|signal transduction|protein processing	protein binding|peptidase activity|protein phosphatase type 2A regulator activity|protein phosphatase type 2A regulator activity	protein phosphatase type 2A complex|protein phosphatase type 2A complex|nucleus|integral to membrane	PROTEIN PHOSPHATASE 2A, REGULATORY SUBUNIT		Phosphatase >Protein phosphatase.
64682	ANAPC1	anaphase promoting complex subunit 1	Y	regulation of progression through cell cycle|ubiquitin cycle|cell cycle|mitosis|cell division			MEIOTIC CHECKPOINT REGULATOR TSG24 FAMILY MEMBER		Ligase >Other ligase.
1894	ECT2	epithelial cell transforming sequence 2 oncogene	Y	intracellular signaling cascade|regulation of Rho protein signal transduction|positive regulation of I-kappaB kinase/NF-kappaB cascade	signal transducer activity|guanyl-nucleotide exchange factor activity|Rho guanyl-nucleotide exchange factor activity|protein binding	intracellular	EPITHELIAL CELL TRANSFORMING-2 (ECT-2)		Signaling molecule.
3949	LDLR	low density lipoprotein receptor (familial hypercholesterolemia)	N	protein amino acid O-linked glycosylation|lipid metabolic process|lipid transport|endocytosis|steroid metabolic process|cholesterol metabolic process|cholesterol absorption|cholesterol transport|lipoprotein metabolic process|cholesterol homeostasis	receptor activity|transmembrane receptor activity|low-density lipoprotein receptor activity|lipid transporter activity|calcium ion binding|lipoprotein binding	endosome|plasma membrane|integral to plasma membrane|membrane	LOW DENSITY LIPOPROTEIN RECEPTOR	LOW-DENSITY LIPOPROTEIN RECEPTOR (LDL)	Receptor >Other receptor.
9493	KIF23	kinesin family member 23	Y	mitotic spindle elongation|microtubule-based movement|cell cycle|mitosis|cell division	nucleotide binding|microtubule motor activity|protein binding|ATP binding	spindle|kinesin complex|microtubule	KINESIN HEAVY CHAIN	KINESIN-LIKE PROTEIN KIF23 (MITOTIC KINESIN-LIKE PROTEIN-1)	Cytoskeletal protein >Microtubule family cytoskeletal protein >Microtubule binding motor protein.
		red = not in secondary screen
		black = not confirmed in secondary screen
		green = confirmed in secondary screen

## Sheet: reduced infection
Entrez_Gene_Id	Gene_Symbol	Gene_Name	Confirmed in rescreen (Y/N)	GO_Process	GO_Function	GO_Component	Panther_Family	Panther_Sub_Family	Panther_Molecular_Function_1
2778	GNAS	GNAS complex locus	Y	protein targeting|Golgi to secretory vesicle transport|signal transduction|signal transduction|G-protein coupled receptor protein signaling pathway|adenylate cyclase activation|female pregnancy|sensory perception of smell|protein secretion	nucleotide binding|molecular_function|GTPase activity|signal transducer activity|protein binding|GTP binding|GTP binding|guanyl nucleotide binding	Golgi trans cisterna|extracellular region|cytoplasm|heterotrimeric G-protein complex|plasma membrane|plasma membrane|membrane|cell projection	NEUROENDOCRINE SECRETORY PROTEIN NESP55		Select regulatory molecule >G-protein >Large G-protein.
329	BIRC2	baculoviral IAP repeat-containing 2	N	placenta development|anti-apoptosis|cell surface receptor linked signal transduction|regulation of apoptosis|positive regulation of I-kappaB kinase/NF-kappaB cascade	signal transducer activity|protein binding|zinc ion binding|metal ion binding	intracellular|cytoplasm	INHIBITOR OF APOPTOSIS	INHIBITOR OF APOPTOSIS PROTEIN 1 AND 2, IAP1, IAP2	Select regulatory molecule >Protease inhibitor.
3449	IFNA16	interferon, alpha 16	N	defense response|response to virus	interferon-alpha/beta receptor binding	extracellular region|extracellular space	TYPE I INTERFERON	INTERFERON ALPHA	Signaling molecule >Cytokine >Interferon.
2737	GLI3	GLI-Kruppel family member GLI3 (Greig cephalopolysyndactyly syndrome)	N	protein import into nucleus, translocation|metanephros development|ureteric bud branching|transcription|regulation of transcription, DNA-dependent|transcription from RNA polymerase II promoter|signal transduction|smoothened signaling pathway|pattern specification process|hindgut morphogenesis|heart development|negative regulation of cell proliferation|anterior/posterior pattern formation|proximal…	nucleic acid binding|chromatin binding|transcription factor activity|protein binding|zinc ion binding|sequence-specific DNA binding|metal ion binding	intracellular|nucleus|cytoplasm|transcriptional repressor complex	ZINC FINGER PROTEIN ZIC AND GLI	ZINC FINGER PROTEIN GLI3	Transcription factor >Zinc finger transcription factor.
6223	RPS19	ribosomal protein S19	N	translation|response to extracellular stimulus|gas transport|erythrocyte differentiation|anatomical structure development|positive regulation of cell motility	RNA binding|structural constituent of ribosome|protein binding	intracellular|nucleolus|ribosome|cytosolic small ribosomal subunit (sensu Eukaryota)	40S RIBOSOMAL PROTEIN S19		Nucleic acid binding >Ribosomal protein.
137829	LOC137829
55182	C1orf164	chromosome 1 open reading frame 164			protein binding|zinc ion binding|metal ion binding		UNCHARACTERIZED		Molecular function unclassified.
2882	GPX7	glutathione peroxidase 7	N	response to oxidative stress	glutathione peroxidase activity|oxidoreductase activity		GLUTATHIONE PEROXIDASE		Oxidoreductase >Peroxidase.
9993	DGCR2	DiGeorge syndrome critical region gene 2	N	cell adhesion|organ morphogenesis	receptor activity|protein binding|sugar binding	membrane|integral to membrane	FAMILY NOT NAMED	SUBFAMILY NOT NAMED	Molecular function unclassified.
11202	KLK8	kallikrein-related peptidase 8	Y	proteolysis|nervous system development	serine-type endopeptidase activity|peptidase activity		SERINE PROTEASE-RELATED	NEUROPSIN (KALLIKREIN 8) (BRAIN SERINE PROTEASE 1)	Protease >Serine protease.
9352	TXNL1	thioredoxin-like 1	Y	electron transport|transport|apoptosis|signal transduction|cell redox homeostasis	thiol-disulfide exchange intermediate activity	cytoplasm	THIOREDOXIN-RELATED	THIOREDOXIN WITH DUF1000 DOMAIN	Oxidoreductase >Other oxidoreductase.
8839	WISP2	WNT1 inducible signaling pathway protein 2	N	regulation of cell growth|cell adhesion|signal transduction|cell-cell signaling	protein binding|insulin-like growth factor binding	extracellular region|soluble fraction|plasma membrane	CONNECTIVE TISSUE GROWTH FACTOR-RELATED	CONNECTIVE TISSUE GROWTH FACOTR WISP2/CCN5	Signaling molecule >Growth factor.
4149	MAX	MYC associated factor X		regulation of transcription, DNA-dependent|transcription from RNA polymerase II promoter|regulation of transcription	transcription factor activity|transcription factor activity|transcription coactivator activity|protein binding|transcription regulator activity	nucleus	BHLHZIP TRANSCRIPTION FACTOR MAX/BIGMAX		Transcription factor >Basic helix-loop-helix transcription factor. Nucleic acid binding.
4190	MDH1	malate dehydrogenase 1, NAD (soluble)	N	glycolysis|tricarboxylic acid cycle|malate metabolic process	malic enzyme activity|oxidoreductase activity|L-malate dehydrogenase activity	cytoplasm|cytosol	MALATE DEHYDROGENASE		Oxidoreductase >Dehydrogenase.
7220	TRPC1	transient receptor potential cation channel, subfamily C, member 1	Y	ion transport|calcium ion transport	ion channel activity|calcium ion binding|protein binding|store-operated calcium channel activity	plasma membrane|integral to plasma membrane	TRANSIENT RECEPTOR POTENTIAL CHANNEL	TRANSIENT RECEPTOR POTENTIAL CHANNEL 1	Ion channel >Other ion channel.
777	CACNA1E	calcium channel, voltage-dependent, R type, alpha 1E subunit	Y	ion transport|calcium ion transport|synaptic transmission	voltage-gated ion channel activity|voltage-gated calcium channel activity|calcium ion binding	voltage-gated calcium channel complex|membrane|integral to membrane	VOLTAGE-GATED CATION CHANNEL (CALCIUM AND SODIUM)	VOLTAGE-DEPENDENT R-TYPE CALCIUM CHANNEL ALPHA-1E SUBUNIT	Ion channel >Voltage-gated ion channel >Voltage-gated calcium channel.
79885	HDAC11	histone deacetylase 11	Y	transcription|regulation of transcription, DNA-dependent|chromatin modification|histone deacetylation	histone deacetylase activity|transcription factor binding|hydrolase activity	histone deacetylase complex|nucleus|plasma membrane	HISTONE DEACETYLASE	HISTONE DEACETYLASE 11	Nucleic acid binding. Hydrolase >Deacetylase.
655	BMP7	bone morphogenetic protein 7 (osteogenic protein 1)	Y	ossification|mesoderm formation|kidney development|epithelial to mesenchymal transition|pattern specification process|axon guidance|salivary gland morphogenesis|organ morphogenesis|BMP signaling pathway|growth|odontogenesis (sensu Vertebrata)|positive regulation of cell differentiation|negative regulation of progression through cell cycle|positive regulation of transcription|cell development|bran…	cytokine activity|protein binding|growth factor activity	extracellular space	TGF-BETA FAMILY	BONE MORPHOGENETIC PROTEIN 5/7, BMP5/7	Signaling molecule >Other signaling molecule.
6726	SRP9	signal recognition particle 9kDa	N	SRP-dependent cotranslational protein targeting to membrane|negative regulation of translational elongation	signal recognition particle binding|protein binding|7S RNA binding	cytoplasm|signal recognition particle receptor complex|signal recognition particle, endoplasmic reticulum targeting|signal recognition particle	SIGNAL RECOGNITION PARTICLE 9 KDA PROTEIN	SUBFAMILY NOT NAMED	Molecular function unclassified.
158	ADSL	adenylosuccinate lyase	N	purine ribonucleotide biosynthetic process	adenylosuccinate lyase activity|lyase activity	cytoplasm	ASPARTATEAMMONIA/ARGININOSUCCINATE/ADENYLOSUCCINATE LYASE	ADENYLOSUCCINATE LYASE	Lyase >Other lyase.
9354	UBE4A	ubiquitination factor E4A (UFD2 homolog, yeast)	Y	ubiquitin-dependent protein catabolic process|protein ubiquitination	ubiquitin-protein ligase activity|protein binding	ubiquitin ligase complex	UBIQUITINATION FACTOR E4	UBIQUITINATION FACTOR E4A	Select regulatory molecule >Other enzyme regulator.
478	ATP1A3	ATPase, Na+/K+ transporting, alpha 3 polypeptide	Y	potassium ion transport|sodium ion transport|metabolic process|monovalent inorganic cation transport|sperm motility|cellular hydrogen ion homeostasis	nucleotide binding|magnesium ion binding|sodium:potassium-exchanging ATPase activity|ATP binding|ATP binding|monovalent inorganic cation transmembrane transporter activity|ATPase activity, coupled to transmembrane movement of ions, phosphorylative mechanism|hydrolase activity|hydrolase activity, acting on acid anhydrides, catalyzing transmembrane movement of substances|potassium ion binding|sodiu…	endoplasmic reticulum|Golgi apparatus|plasma membrane|sodium:potassium-exchanging ATPase complex|membrane|integral to membrane|integral to membrane	CATION-TRANSPORTING ATPASE	NA+/K+ ATPASE ALPHA SUBUNIT	Ion channel. Transporter >Cation transporter. Hydrolase >Other hydrolase.
10333	TLR6	toll-like receptor 6	Y	inflammatory response|signal transduction|activation of NF-kappaB-inducing kinase|T-helper 1 type immune response|defense response to bacterium|positive regulation of I-kappaB kinase/NF-kappaB cascade|positive regulation of JNK activity|innate immune response|positive regulation of interleukin-6 biosynthetic process	transmembrane receptor activity|protein binding|lipoprotein binding	integral to plasma membrane|membrane|cytoplasmic vesicle	LEUCINE-RICH TRANSMEMBRANE PROTEINS	TOLL-LIKE RECEPTOR-1, 6 AND 10	Receptor. Extracellular matrix.
221	ALDH3B1	aldehyde dehydrogenase 3 family, member B1	N	alcohol metabolic process|aldehyde metabolic process|lipid metabolic process|metabolic process	3-chloroallyl aldehyde dehydrogenase activity|aldehyde dehydrogenase [NAD(P)+] activity|oxidoreductase activity		ALDEHYDE DEHYDROGENASE-RELATED	ALDEHYDE DEHYDROGENASE	Oxidoreductase >Dehydrogenase.
3265	HRAS	v-Ha-ras Harvey rat sarcoma viral oncogene homolog	Y	regulation of progression through cell cycle|chemotaxis|cell surface receptor linked signal transduction|small GTPase mediated signal transduction|organ morphogenesis	nucleotide binding|GTP binding|protein C-terminus binding	intracellular|cytoplasm|plasma membrane	RAS-RELATED GTPASE	RAS	Select regulatory molecule >G-protein >Small GTPase.
388	RHOB	ras homolog gene family, member B	Y	angiogenesis|transformed cell apoptosis|cell cycle|cell adhesion|small GTPase mediated signal transduction|Rho protein signal transduction|multicellular organismal development|endosome to lysosome transport|protein transport|cell differentiation|positive regulation of angiogenesis|negative regulation of progression through cell cycle	nucleotide binding|GTPase activity|protein binding|GTP binding	intracellular|nucleus|endosome|plasma membrane|endosome membrane	RAS-RELATED GTPASE	GTPASE_RHO	Select regulatory molecule >G-protein >Small GTPase.
1861	TOR1A	torsin family 1, member A (torsin A)	Y	protein folding|response to unfolded protein|chaperone cofactor-dependent protein folding	nucleotide binding|ATP binding|endopeptidase Clp activity|unfolded protein binding	cytoplasm|endoplasmic reticulum|membrane	TORSIN		Molecular function unclassified.
7159	TP53BP2	tumor protein p53 binding protein, 2	Y	apoptosis|induction of apoptosis|cell cycle|signal transduction|central nervous system development|heart development|embryonic development ending in birth or egg hatching|response to ionizing radiation|negative regulation of progression through cell cycle	SH3/SH2 adaptor activity|protein binding|NF-kappaB binding	cytoplasm	ANKYRIN REPEAT-CONTAINING	APOPTOSIS STIMULATING OF P53	Select regulatory molecule.
134728	IRAK1BP1	interleukin-1 receptor-associated kinase 1 binding protein 1	Y	I-kappaB kinase/NF-kappaB cascade	receptor activity|protein binding|kinase activity		No PANTHER hit		Molecular function unclassified.
54331	GNG2	guanine nucleotide binding protein (G protein), gamma 2	Y	signal transduction|G-protein coupled receptor protein signaling pathway|cell proliferation	signal transducer activity	heterotrimeric G-protein complex|membrane	GUANINE NUCLEOTIDE-BINDING PROTEIN GAMMA SUBUNIT	GUANINE NUCLEOTIDE-BINDING PROTEIN G(I)/G(S)/G(O) GAMMA-2	Select regulatory molecule >G-protein >Large G-protein.
219699	UNC5B	unc-5 homolog B (C. elegans)	Y	apoptosis|signal transduction|multicellular organismal development	receptor activity|protein binding	membrane|integral to membrane	NETRIN RECEPTOR UNC5	NETRIN RECEPTOR UNC5B	Receptor.
113026	PLCD3	phospholipase C, delta 3	Y	lipid metabolic process|intracellular signaling cascade	phosphoinositide phospholipase C activity|calcium ion binding		PHOSPHOLIPASE C	PHOSPHOLIPASE C DELTA 3	Hydrolase >Lipase >Phospholipase. Select calcium binding protein.
85397	RGS8	regulator of G-protein signaling 8	Y	negative regulation of signal transduction	signal transducer activity		REGULATOR OF G PROTEIN SIGNALING, RGS	REGULATOR OF G PROTEIN SIGNALING 8, RGS8	Select regulatory molecule >G-protein modulator >Other G-protein modulator.
107	ADCY1	adenylate cyclase 1 (brain)	Y	cAMP biosynthetic process|intracellular signaling cascade	magnesium ion binding|calmodulin binding|calcium- and calmodulin-responsive adenylate cyclase activity	membrane|integral to membrane	ADENYLATE AND GUANYLATE CYCLASES	ADENYLATE CYCLASE TYPE 1	Lyase >Cyclase >Adenylate cyclase.
285282	RABL3	RAB, member of RAS oncogene family-like 3	N	regulation of transcription, DNA-dependent|small GTPase mediated signal transduction	nucleotide binding|ATP binding|GTP binding|transcription factor binding	intracellular	RAS-RELATED GTPASE	RAB, MEMBER OF RAS ONCOGENE FAMILY	Select regulatory molecule >G-protein >Small GTPase.
9635	CLCA2	chloride channel, calcium activated, family member 2	N	transport	chloride channel activity	integral to plasma membrane	CA-ACTIVATED CL CHANNEL PROTEIN 2		Ion channel.
54	ACP5	acid phosphatase 5, tartrate resistant	Y		acid phosphatase activity|iron ion binding|hydrolase activity|metal ion binding	lysosome|integral to membrane	TARTRATE-RESISTANT ACID PHOSPHATASE	TARTRATE-RESISTANT ACID PHOSPHATASE TYPE 5	Phosphatase >Other phosphatase.
9464	HAND2	heart and neural crest derivatives expressed 2		angiogenesis|in utero embryonic development|heart looping|regulation of transcription, DNA-dependent|transcription from RNA polymerase II promoter|multicellular organismal development|adult heart development|neural crest cell development|cell differentiation|regulation of transcription|positive regulation of transcription from RNA polymerase II promoter	transcription factor activity|transcription regulator activity|identical protein binding|protein heterodimerization activity	nucleus|transcription factor complex	BASIC HELIX-LOOP-HELIX TRANSCRIPTION FACTOR, TWIST	DHAND	Transcription factor >Basic helix-loop-helix transcription factor. Nucleic acid binding.
2898	GRIK2	glutamate receptor, ionotropic, kainate 2	Y	ion transport|glutamate signaling pathway|induction of programmed cell death in response to chemical stimulus|regulation of short-term neuronal synaptic plasticity|positive regulation of synaptic transmission|neuron apoptosis	receptor activity|ion channel activity|extracellular-glutamate-gated ion channel activity|kainate selective glutamate receptor activity	integral to plasma membrane|membrane|cell junction|synapse	IONOTROPIC GLUTAMATE RECEPTOR-RELATED	GLUTAMATE RECEPTOR, IONOTROPIC KAINATE 2	Receptor >Ligand-gated ion channel >Glutamate receptor. Ion channel >Ligand-gated ion channel >Glutamate receptor.
6498	SKIL	SKI-like oncogene	Y	transcription from RNA polymerase II promoter|signal transduction|multicellular organismal development	nucleotide binding|transcription corepressor activity|transforming growth factor beta receptor, cytoplasmic mediator activity|protein binding	nucleus	SNO AND SKI ONCOGENE FAMILY	SKI-RELATED ONCOGENE SNO	Transcription factor >Other transcription factor.
10225	CD96	CD96 molecule	N	immune response|cell adhesion	protein binding	plasma membrane|integral to plasma membrane	FAMILY NOT NAMED		Defense/immunity protein.
5576	PRKAR2A	protein kinase, cAMP-dependent, regulatory, type II, alpha	Y	protein amino acid phosphorylation|signal transduction|intracellular signaling cascade	nucleotide binding|cAMP-dependent protein kinase regulator activity|cAMP-dependent protein kinase regulator activity|kinase activity|cAMP binding	membrane fraction|cytoplasm|plasma membrane|cAMP-dependent protein kinase complex	CAMP-DEPENDENT PROTEIN KINASE REGULATORY CHAIN	CAMP-DEPENDENT PROTEIN KINASE TYPE II-ALPHA REGULATORY SUBUNIT	Select regulatory molecule >Kinase modulator.
1783	DYNC1LI2	dynein, cytoplasmic 1, light intermediate chain 2	Y		nucleotide binding|motor activity|ATP binding	cytoplasmic dynein complex|microtubule	DYNEIN LIGHT INTERMEDIATE CHAIN		Cytoskeletal protein >Microtubule family cytoskeletal protein. Select regulatory molecule.
112858	TP53RK	TP53 regulating kinase	Y	protein amino acid phosphorylation	nucleotide binding|protein serine/threonine kinase activity|protein-tyrosine kinase activity|protein binding|ATP binding|transferase activity		O-SIALOGLYCOPROTEIN ENDOPEPTIDASE		Protease >Metalloprotease.
83877	TM2D2	TM2 domain containing 2	Y				BETA-AMYLOID BINDING PROTEIN-RELATED		Miscellaneous function >Other miscellaneous function protein.
3775	KCNK1	potassium channel, subfamily K, member 1	Y	ion transport|potassium ion transport|potassium ion transport	ion channel activity|inward rectifier potassium channel activity|voltage-gated ion channel activity|potassium channel activity|potassium ion binding	membrane fraction|voltage-gated potassium channel complex|membrane|integral to membrane	POTASSIUM CHANNEL, SUBFAMILY K	POTASSIUM CHANNEL SUBFAMILY K MEMBER 1 (INWARD RECTIFYING POTASSIUM CHANNEL PROTEIN TWIK-1)	Ion channel >Voltage-gated ion channel >Voltage-gated potassium channel.
5066	PAM	peptidylglycine alpha-amidating monooxygenase	N	peptide amidation|protein modification process|peptide metabolic process|mitotic chromosome condensation	chromatin binding|monooxygenase activity|peptidylglycine monooxygenase activity|peptidylglycine monooxygenase activity|peptidylamidoglycolate lyase activity|copper ion binding|protein binding|zinc ion binding|lyase activity|L-ascorbic acid binding|metal ion binding	nuclear chromatin|condensed chromosome|membrane|integral to membrane|secretory granule|secretory granule	PEPTIDYL-GLYCINE ALPHA-AMIDATING MONOOXYGENASE		Oxidoreductase >Oxygenase.
23052	ENDOD1	endonuclease domain containing 1	N		nucleic acid binding|endonuclease activity|hydrolase activity		K123 PROTEIN		Molecular function unclassified.
131034	CPNE4	copine IV	Y				COPINE		Miscellaneous function >Other miscellaneous function protein. Membrane traffic protein >Other membrane traffic protein.
9891	NUAK1	NUAK family, SNF1-like kinase, 1	N	protein amino acid phosphorylation	nucleotide binding|magnesium ion binding|protein serine/threonine kinase activity|protein binding|ATP binding|transferase activity		CALCIUM/CALMODULIN-DEPENDENT PROTEIN KINASE-RELATED	AMPK-RELATED PROTEIN KINASE 5	Kinase >Protein kinase >Non-receptor serine/threonine protein kinase.
9527	GOSR1	golgi SNAP receptor complex member 1	Y	intracellular protein transport|ER to Golgi vesicle-mediated transport|intra-Golgi vesicle-mediated transport		membrane|integral to membrane	GOS-28 SNARE- RELATED		Membrane traffic protein >SNARE protein.
10577	NPC2	Niemann-Pick disease, type C2	Y	regulation of isoprenoid metabolic process|cholesterol homeostasis	enzyme binding		NIEMANN PICK TYPE C2 PROTEIN NPC2-RELATED		Molecular function unclassified.
1557	CYP2C19	cytochrome P450, family 2, subfamily C, polypeptide 19	N	electron transport	monooxygenase activity|iron ion binding|oxidoreductase activity, acting on paired donors, with incorporation or reduction of molecular oxygen, reduced flavin or flavoprotein as one donor, and incorporation of one atom of oxygen|(S)-limonene 6-monooxygenase activity|(S)-limonene 7-monooxygenase activity|oxygen binding|heme binding|metal ion binding	endoplasmic reticulum|microsome|membrane	CYTOCHROME P450	CYTOCHROME P450, SUBFAMILY 2C	Oxidoreductase >Oxygenase.
22853	LMTK2	lemur tyrosine kinase 2	Y	protein amino acid autophosphorylation|protein amino acid autophosphorylation	nucleotide binding|protein serine/threonine kinase activity|protein serine/threonine kinase activity|protein-tyrosine kinase activity|protein phosphatase inhibitor activity|protein phosphatase inhibitor activity|protein binding|protein binding|ATP binding|transferase activity	membrane|integral to membrane|integral to membrane	TYROSINE PROTEIN KINASE	BRAIN APOPTOSIS-ASSOCIATED TYROSINE KINASE	Receptor >Protein kinase receptor >Tyrosine protein kinase receptor. Kinase >Protein kinase >Tyrosine protein kinase receptor.
157708	SEC11B	SEC11 homolog B (S. cerevisiae)	Y				PROTEASE FAMILY S26 MICROSOMAL SIGNAL PEPTIDASE SUBUNIT SPC18,21/SEC11(YEAST)		Protease >Serine protease.
2054	STX2	syntaxin 2	Y	intracellular protein transport|signal transduction|ectoderm development|organ morphogenesis|vesicle-mediated transport	protein binding|protein transporter activity	soluble fraction|microsome|membrane|integral to membrane	SYNTAXIN	SYNTAXIN 2	Membrane traffic protein >SNARE protein.
1452	CSNK1A1	casein kinase 1, alpha 1	Y	protein amino acid phosphorylation|protein amino acid phosphorylation|Wnt receptor signaling pathway	nucleotide binding|protein serine/threonine kinase activity|casein kinase I activity|ATP binding|transferase activity	cytoplasm	CASEIN KINASE-RELATED	CASEIN KINASE	Kinase >Protein kinase >Non-receptor serine/threonine protein kinase.
11031	RAB31	RAB31, member RAS oncogene family	Y	small GTPase mediated signal transduction|protein transport	nucleotide binding|GTPase activity|GTP binding	membrane	RAS-RELATED GTPASE	RAS-RELATED PROTEIN RAB-22	Select regulatory molecule >G-protein >Small GTPase.
1572	CYP2F1	cytochrome P450, family 2, subfamily F, polypeptide 1	N	electron transport	monooxygenase activity|iron ion binding|oxygen binding|heme binding|metal ion binding|unspecific monooxygenase activity	endoplasmic reticulum|microsome|membrane	CYTOCHROME P450	CYTOCHROME P450, SUBFAMILY 2F	Oxidoreductase >Oxygenase.
92	ACVR2A	activin A receptor, type IIA	Y	protein amino acid phosphorylation|transmembrane receptor protein serine/threonine kinase signaling pathway|spermatogenesis|determination of left/right symmetry|mesoderm development|anterior/posterior pattern formation|positive regulation of activin receptor signaling pathway|sperm ejaculation|penile erection|positive regulation of erythrocyte differentiation|gastrulation (sensu Vertebrata)|embry…	nucleotide binding|magnesium ion binding|receptor activity|ATP binding|transferase activity|activin receptor activity|growth factor binding|manganese ion binding|protein self-association|inhibin beta-A binding	cytoplasm|integral to plasma membrane|membrane	TRANSFORMING GROWTH FACTOR-BETA RECEPTOR TYPE I AND II	ACTIVIN RECEPTOR TYPE II	Receptor >Cytokine receptor >TGF-beta receptor. Receptor >Protein kinase receptor >Serine/threonine protein kinase receptor. Kinase >Protein kinase >Serine/threonine protein kinase receptor.
9969	MED13	mediator complex subunit 13		transcription|regulation of transcription, DNA-dependent|transcription initiation from RNA polymerase II promoter|androgen receptor signaling pathway|positive regulation of transcription from RNA polymerase II promoter	receptor activity|RNA polymerase II transcription mediator activity|ligand-dependent nuclear receptor transcription coactivator activity|vitamin D receptor binding|thyroid hormone receptor binding	mediator complex|nucleus	FAMILY NOT NAMED	SUBFAMILY NOT NAMED	Molecular function unclassified.
84342	COG8	component of oligomeric golgi complex 8	N	protein transport		membrane|Golgi transport complex	CONSERVED OLIGOMERIC GOLGI COMPLEX COMPONENT 8		Molecular function unclassified.
9581	PREPL	prolyl endopeptidase-like	N	proteolysis	prolyl oligopeptidase activity		PROTEASE FAMILY S9A OLIGOPEPTIDASE	OLIGOPEPTIDASE B (LYSYL AND ARGININYL OLIGOPEPTIDASE)	Protease >Serine protease.
79733	E2F8	E2F transcription factor 8	N	regulation of progression through cell cycle|transcription|regulation of transcription, DNA-dependent	transcription factor activity	transcription factor complex	E2F	E2F RELATED	Transcription factor >Other transcription factor. Nucleic acid binding.
7145	TNS1	tensin 1	Y	intracellular signaling cascade	actin binding	cytoplasm|cytoskeleton|cell junction	PHOSPHATASE WITH HOMOLOGY TO TENSIN	TENS	Phosphatase >Protein phosphatase. Phosphatase >Other phosphatase.
339398	LINGO4	leucine rich repeat and Ig domain containing 4	N		protein binding	membrane|integral to membrane	LEUCINE-RICH TRANSMEMBRANE PROTEINS	LEUCINE-RICH TRANSMEMBRANE PROTEIN	Receptor. Extracellular matrix.
1259	CNGA1	cyclic nucleotide gated channel alpha 1	N	ion transport|potassium ion transport|visual perception|response to stimulus	nucleotide binding|voltage-gated potassium channel activity|ligand-gated ion channel activity|cGMP binding	photoreceptor outer segment|membrane fraction|integral to plasma membrane|membrane	VOLTAGE AND LIGAND GATED POTASSIUM CHANNEL	CYCLIC-NUCLEOTIDE-GATED CHANNEL ALPHA SUBUNIT	Receptor >Ligand-gated ion channel >Cyclic nucleotide-gated ion channel. Ion channel >Ligand-gated ion channel >Cyclic nucleotide-gated ion channel.
5826	ABCD4	ATP-binding cassette, sub-family D (ALD), member 4	Y	transport|transport	nucleotide binding|transporter activity|ATP binding|ATPase activity|ATPase activity, coupled to transmembrane movement of substances	peroxisome|peroxisomal membrane|membrane|integral to membrane|ATP-binding cassette (ABC) transporter complex	ATP-BINDING CASSETTE, SUB-FAMILY D MEMBER	ATP-BINDING CASSETTE, SUB-FAMILY D, MEMBER 4 (PEROXISOMAL MEMBRANE PROTEIN 69)	Transporter.
256356	GK5	glycerol kinase 5 (putative)	N	carbohydrate metabolic process|glycerol-3-phosphate metabolic process	glycerol kinase activity|transferase activity		XYLULOSE KINASE	GLYCEROL KINASE	Kinase >Carbohydrate kinase.
10026	PIGK	phosphatidylinositol glycan anchor biosynthesis, class K	Y	protein thiol-disulfide exchange|proteolysis|attachment of GPI anchor to protein	legumain activity|GPI-anchor transamidase activity|protein binding|GPI anchor binding	endoplasmic reticulum|membrane|integral to membrane|GPI-anchor transamidase complex	HEMOGLOBINASE FAMILY MEMBER	GPI-ANCHOR TRANSAMIDASE	Transferase.
94239	H2AFV	H2A histone family, member V	Y	nucleosome assembly|chromosome organization and biogenesis (sensu Eukaryota)	DNA binding	nucleosome|nucleus|chromosome	HISTONE H2A		Nucleic acid binding >Histone.
433	ASGR2	asialoglycoprotein receptor 2	N	endocytosis|cell surface receptor linked signal transduction	receptor activity|asialoglycoprotein receptor activity|calcium ion binding|protein binding|sugar binding	cellular_component|membrane|integral to membrane	C-TYPE LECTIN SUPERFAMILY MEMBER	ASIALOGLYCOPROTEIN RECEPTOR	Receptor >Other receptor.
29127	RACGAP1	Rac GTPase activating protein 1	Y	cytokinesis|cytokinesis, contractile ring formation|cell cycle|cytokinesis, initiation of separation|signal transduction|intracellular signaling cascade|spermatogenesis|neuroblast proliferation|embryonic development	GTPase activator activity|protein binding|zinc ion binding|diacylglycerol binding|alpha-tubulin binding|gamma-tubulin binding|metal ion binding|beta-tubulin binding	intracellular|nucleus|cytoplasm|microtubule	RAC GTPASE ACTIVATING PROTEIN	RACGTPASE-ACTIVATING PROTEIN	Transfer/carrier protein. Select regulatory molecule >G-protein modulator.
3614	IMPDH1	IMP (inosine monophosphate) dehydrogenase 1	N	purine nucleotide biosynthetic process|GMP biosynthetic process|GTP biosynthetic process|visual perception|metabolic process|lymphocyte proliferation|response to stimulus	catalytic activity|IMP dehydrogenase activity|IMP dehydrogenase activity|oxidoreductase activity|potassium ion binding|metal ion binding		INOSINE-5-MONOPHOSPHATE DEHYDROGENASE RELATED	INOSINE-5-MONOPHOSPHATE DEHYDROGENASE	Oxidoreductase >Dehydrogenase.
10894	LYVE1	lymphatic vessel endothelial hyaluronan receptor 1	Y	glycosaminoglycan catabolic process|transport|cell motility|cell adhesion|cell-matrix adhesion|response to wounding|anatomical structure morphogenesis	transmembrane receptor activity|hyaluronic acid binding	membrane fraction|plasma membrane|integral to plasma membrane	HYALURONAN RECEPTOR	LYMPHATIC ENDOTHELIAL HYALURONAN RECEPTOR, LYVE-1	Molecular function unclassified.
5563	PRKAA2	protein kinase, AMP-activated, alpha 2 catalytic subunit	Y	protein amino acid phosphorylation|fatty acid biosynthetic process|cholesterol biosynthetic process|signal transduction	nucleotide binding|magnesium ion binding|protein serine/threonine kinase activity|ATP binding|transferase activity	nucleus	CALCIUM/CALMODULIN-DEPENDENT PROTEIN KINASE-RELATED	5-AMP-ACTIVATED PROTEIN KINASE (AMPK) (SNF1-RELATED)	Kinase >Protein kinase >Non-receptor serine/threonine protein kinase.
3939	LDHA	lactate dehydrogenase A	N	tricarboxylic acid cycle intermediate metabolic process|anaerobic glycolysis	L-lactate dehydrogenase activity|protein binding|oxidoreductase activity	cytoplasm|cytosol	MALATE AND LACTATE DEHYDROGENASE	L-LACTATE DEHYDROGENASE	Oxidoreductase >Dehydrogenase.
59352	LGR6	leucine-rich repeat-containing G protein-coupled receptor 6	N	signal transduction|G-protein coupled receptor protein signaling pathway	receptor activity|protein binding|protein-hormone receptor activity	membrane|integral to membrane	LEUCINE-RICH TRANSMEMBRANE PROTEINS	LEUCINE-RICH REPEAT-CONTAINING G-PROTEIN COUPLED RECEPTOR 6, LGR6, GONADOTROPIN RECEPTOR	Receptor. Extracellular matrix.
347732	CATSPER3	cation channel, sperm associated 3	N	ion transport|calcium ion transport|multicellular organismal development|spermatogenesis|cell differentiation	voltage-gated ion channel activity|calcium channel activity|calcium ion binding	cilium|membrane|integral to membrane|flagellum	VOLTAGE-GATED CATION CHANNEL (CALCIUM AND SODIUM)	SPERM-ASSOCIATED CATION CHANNEL 4-RELATED	Ion channel.
55224	ETNK2	ethanolamine kinase 2	N	biological_process	choline kinase activity|ethanolamine kinase activity|kinase activity|transferase activity	cellular_component	CHOLINE/ETHANOALAMINE KINASE	CHOLINE/ETHANOLAMINE KINASE	Kinase >Other kinase.
2203	FBP1	fructose-1,6-bisphosphatase 1	N	carbohydrate metabolic process|fructose metabolic process|gluconeogenesis	fructose-2,6-bisphosphate 2-phosphatase activity|zinc ion binding|hydrolase activity|fructose-bisphosphatase activity|phosphoric ester hydrolase activity|identical protein binding		FRUCTOSE-1,6-BISPHOSPHATASE-RELATED		Phosphatase >Carbohydrate phosphatase.
10267	RAMP1	receptor (G protein-coupled) activity modifying protein 1	Y	transport|intracellular protein transport|regulation of G-protein coupled receptor protein signaling pathway	receptor activity|protein transporter activity	plasma membrane|integral to plasma membrane	RECEPTOR ACTIVITY MODIFYING PROTEIN (RAMP)	RECEPTOR ACTIVITY MODIFYING PROTEIN 1, RAMP1	Receptor >Other receptor.
9639	ARHGEF10	Rho guanine nucleotide exchange factor (GEF) 10	Y	regulation of Rho protein signal transduction	guanyl-nucleotide exchange factor activity|Rho guanyl-nucleotide exchange factor activity	intracellular	RHO GUANINE NUCLEOTIDE EXCHANGE FACTOR	RHO GUANINE NUCLEOTIDE EXCHANGE FACTOR 10	Protease >Cysteine protease.
3570	IL6R	interleukin 6 receptor	Y	immune response|cell surface receptor linked signal transduction|multicellular organismal development|cell proliferation	receptor activity|hematopoietin/interferon-class (D200-domain) cytokine receptor activity|interleukin-6 receptor activity|enzyme binding	extracellular region|interleukin-6 receptor complex|membrane	CYTOKINE RECEPTOR	INTERLEUKIN-6 RECEPTOR ALPHA	Receptor >Cytokine receptor >Interleukin receptor.
7473	WNT3	wingless-type MMTV integration site family, member 3	N	Wnt receptor signaling pathway, calcium modulating pathway|cell-cell signaling|multicellular organismal development|anatomical structure morphogenesis	signal transducer activity|extracellular matrix structural constituent|protein binding	extracellular region|proteinaceous extracellular matrix	WNT RELATED	WNT-3	Signaling molecule >Other signaling molecule.
55277	FLJ10986	hypothetical protein FLJ10986	N	carbohydrate metabolic process			XYLULOSE KINASE	RIBITOL KINASE	Kinase >Carbohydrate kinase.
11082	ESM1	endothelial cell-specific molecule 1	Y	regulation of cell growth|biological_process	protein binding|insulin-like growth factor binding|growth factor activity	extracellular region|extracellular region	ENDOTHELIAL CELL-SPECIFIC MOLECULE 1 (ESM-1)		Signaling molecule >Growth factor.
174	AFP	alpha-fetoprotein	N	ovulation (sensu Mammalia)|transport|immune response|sexual reproduction|progesterone metabolic process	copper ion binding|nickel ion binding|metal ion binding	extracellular region|extracellular space	SERUM ALBUMIN-RELATED	ALPHA-FETOPROTEIN	Transfer/carrier protein >Other transfer/carrier protein.
5684	PSMA3	proteasome (prosome, macropain) subunit, alpha type, 3	Y	ubiquitin-dependent protein catabolic process	threonine endopeptidase activity|protein binding	nucleus|cytoplasm|cytosol|proteasome core complex (sensu Eukaryota)	PROTEASOME SUBUNIT ALPHA/BETA	PROTEASOME SUBUNIT ALPHA TYPE 3	Protease >Other proteases.
438	ASMT	acetylserotonin O-methyltransferase	N	translation|melatonin biosynthetic process|rhythmic process	neuropeptide hormone activity|transferase activity|acetylserotonin O-methyltransferase activity		O-METHYLTRANSFERASE		Transferase >Methyltransferase.
34	ACADM	acyl-Coenzyme A dehydrogenase, C-4 to C-12 straight chain	Y	electron transport|lipid metabolic process|fatty acid metabolic process|fatty acid beta-oxidation|metabolic process	acyl-CoA dehydrogenase activity|acyl-CoA dehydrogenase activity|FAD binding	mitochondrion|mitochondrial matrix	ELECTRON TRANSPORT OXIDOREDUCTASE	ACYL-COA DEHYDROGENASE	Oxidoreductase >Dehydrogenase.
1903	EDG3	endothelial differentiation, sphingolipid G-protein-coupled receptor, 3	N	inflammatory response|signal transduction|G-protein coupled receptor protein signaling pathway|G-protein signaling, adenylate cyclase inhibiting pathway|elevation of cytosolic calcium ion concentration|positive regulation of cell proliferation|anatomical structure morphogenesis	lysosphingolipid and lysophosphatidic acid receptor activity|receptor activity|lipid binding	plasma membrane|integral to plasma membrane	G-PROTEIN COUPLED RECEPTOR	ENDOTHELIAL DIFFERENTIATION, SPHINGOLIPID G-PROTEIN-COUPLED RECEPTOR, 1	Receptor >G-protein coupled receptor.
8683	SFRS9	splicing factor, arginine/serine-rich 9	N	mRNA splice site selection|mRNA processing|RNA splicing	nucleotide binding|RNA binding		ARGININE/SERINE-RICH SPLICING FACTOR		Nucleic acid binding >mRNA processing factor >mRNA splicing factor.
3082	HGF	hepatocyte growth factor (hepapoietin A scatter factor)	Y	epithelial to mesenchymal transition|proteolysis|mitosis|blood coagulation	serine-type endopeptidase activity|calcium ion binding|protein binding|growth factor activity	cellular_component	SERINE PROTEASE-RELATED	HEPATOCYTE GROWTH FACTOR	Signaling molecule >Growth factor. Signaling molecule >Peptide hormone. Select regulatory molecule >Protease inhibitor >Other protease inhibitor. Select regulatory molecule >Other enzyme regulator >Other enzyme inhibitor. Hydrolase. Protease >Serine protease. Defense/immunity protein. Select calcium binding protein >Calmodulin related protein. Select calcium binding protein >Annexin.
9256	BZRAP1	benzodiazapine receptor (peripheral) associated protein 1	Y	biological_process	benzodiazepine receptor binding	cytoplasm|mitochondrion	RIM BINDING PROTEIN-RELATED	BENZODIAZAPINE RECEPTOR ASSOCIATED PROTEIN 1	Molecular function unclassified.
8301	PICALM	phosphatidylinositol binding clathrin assembly protein	Y	protein complex assembly|receptor-mediated endocytosis|clathrin cage assembly	phospholipid binding|phosphatidylinositol binding|clathrin binding	coated pit|membrane|clathrin coat|cytoplasmic vesicle	CLATHRIN ASSEMBLY PROTEIN	PHOSPHATIDYLINOSITOL-BINDING CLATHRIN ASSEMBLY PROTEIN	Membrane traffic protein >Vesicle coat protein.
3760	KCNJ3	potassium inwardly-rectifying channel, subfamily J, member 3	N	ion transport|potassium ion transport	voltage-gated ion channel activity|G-protein activated inward rectifier potassium channel activity|potassium ion binding	voltage-gated potassium channel complex|membrane|integral to membrane	INWARD RECTIFIER POTASSIUM CHANNEL	G PROTEIN-ACTIVATED INWARD RECTIFIER POTASSIUM CHANNEL 1 (KIR3.1)(GIRK1)	Ion channel >Voltage-gated ion channel >Voltage-gated potassium channel.
60386	SLC25A19	solute carrier family 25 (mitochondrial thiamine pyrophosphate carrier), member 19	Y	transport|deoxynucleotide transport	transporter activity|binding|deoxynucleotide transmembrane transporter activity	mitochondrion|mitochondrial inner membrane|membrane|integral to membrane	MITOCHONDRIAL CARRIER PROTEIN RELATED	MITOCHONDRIAL CARRIER PROTEIN-RELATED	Transfer/carrier protein >Mitochondrial carrier protein.
23284	LPHN3	latrophilin 3	N	signal transduction|neuropeptide signaling pathway	receptor activity|G-protein coupled receptor activity|G-protein coupled receptor activity|sugar binding|latrotoxin receptor activity	membrane|integral to membrane|integral to membrane	G-PROTEIN COUPLED RECEPTOR	LATROPHILIN 3	Receptor >G-protein coupled receptor.
28983	TMPRSS11E	transmembrane protease, serine 11E	Y	proteolysis	serine-type endopeptidase activity	integral to plasma membrane|membrane	SERINE PROTEASE-RELATED	SERINE PROTEASE DESC1	Protease >Serine protease.
914	CD2	CD2 molecule	Y	lipid raft polarization|induction of apoptosis|cell surface receptor linked signal transduction|cell-cell adhesion|natural killer cell activation|positive regulation of myeloid dendritic cell activation|T cell activation|regulation of T cell differentiation	receptor activity|protein binding|protein binding	integral to plasma membrane|membrane	SIGNALING LYMPHOCYTIC ACTIVATION MOLECULE	T-CELL SURFACE ANTIGEN CD2 PRECURSOR	Receptor >Immunoglobulin receptor family member. Signaling molecule. Cell adhesion molecule. Kinase >Protein kinase. Defense/immunity protein >Immunoglobulin receptor family member.
9457	FHL5	four and a half LIM domains 5			transcription coactivator activity|zinc ion binding|metal ion binding		LIM DOMAIN CONTAINING PROTEIN	FOUR AND A HALF LIM DOMAINS	Transcription factor >Zinc finger transcription factor >Other zinc finger transcription factor.
10013	HDAC6	histone deacetylase 6	Y	transcription|regulation of transcription, DNA-dependent|cell cycle|multicellular organismal development|chromatin modification|histone deacetylation	actin binding|zinc ion binding|specific transcriptional repressor activity|hydrolase activity|histone deacetylase binding|tubulin deacetylase activity|metal ion binding	histone deacetylase complex|nucleus|cytoplasm|microtubule	HISTONE DEACETYLASE	HISTONE DEACETYLASE 6	Nucleic acid binding. Hydrolase >Deacetylase.
3001	GZMA	granzyme A (granzyme 1, cytotoxic T-lymphocyte-associated serine esterase 3)	Y	proteolysis|apoptosis|cleavage of lamin|immune response|cytolysis	granzyme A activity|peptidase activity|protein homodimerization activity	immunological synapse|nucleus	SERINE PROTEASE-RELATED	GRANZYME A	Protease >Serine protease.
29108	PYCARD	PYD and CARD domain containing	N	proteolysis|induction of apoptosis|caspase activation|cell cycle|signal transduction|regulation of apoptosis|negative regulation of progression through cell cycle|positive regulation of interleukin-1 beta secretion	protein binding|caspase activator activity|caspase activity|Pyrin domain binding|protein homodimerization activity	intracellular|cytoplasm	CASPASE RELATED	CARD DOMAIN CONTAINING	Select regulatory molecule >Protease inhibitor.
9862	MED24	mediator complex subunit 24		transcription|regulation of transcription, DNA-dependent|transcription initiation from RNA polymerase II promoter|androgen receptor signaling pathway	nucleotide binding|transcription cofactor activity|receptor activity|ATP binding|zinc ion binding|RNA polymerase II transcription mediator activity|transcription activator activity|ligand-dependent nuclear receptor transcription coactivator activity|vitamin D receptor binding|metal ion binding|thyroid hormone receptor binding	mediator complex|nucleus	THYROID HORMONE RECEPTOR-ASSOCIATED PROTEIN COMPLEX 100 KDA COMPONENT (TRAP100) (THYROID HORMONE RECEPTOR ASSOCIATED PROTEIN 4)		Receptor.
3843	IPO5	RAN binding protein 5	Y	protein import into nucleus, docking|NLS-bearing substrate import into nucleus|intracellular protein transport	GTPase inhibitor activity|binding|protein binding|nuclear localization sequence binding|Ran GTPase binding|protein transporter activity	nucleus|nuclear pore|cytoplasm	IMPORTIN BETA	IMPORTIN BETA-3	Transporter >Other transporter. Select regulatory molecule >G-protein modulator >Other G-protein modulator.
31	ACACA	acetyl-Coenzyme A carboxylase alpha	Y	fatty acid biosynthetic process|metabolic process	nucleotide binding|acetyl-CoA carboxylase activity|biotin carboxylase activity|protein binding|ATP binding|biotin binding|ligase activity|manganese ion binding|metal ion binding	cytoplasm	CARBOXYLASE:PYRUVATE/ACETYL-COA/PROPIONYL-COA CARBOXYLASE	ACETYL-COA CARBOXYLASE	Ligase >Other ligase.
316	AOX1	aldehyde oxidase 1	Y	electron transport|oxygen and reactive oxygen species metabolic process|inflammatory response	aldehyde oxidase activity|xanthine dehydrogenase activity|iron ion binding|electron carrier activity|oxidoreductase activity|molybdenum ion binding|metal ion binding|NAD binding|2 iron, 2 sulfur cluster binding	cytoplasm	XANTHINE DEHYDROGENASE	ALDEHYDE OXIDASE 2	Molecular function unclassified.
4005	LMO2	LIM domain only 2 (rhombotin-like 1)	Y	multicellular organismal development	protein binding|zinc ion binding|metal ion binding		LIM DOMAIN CONTAINING PROTEIN	LIM-ONLY PROTEIN 2 (RHOMBOTIN-2)	Transcription factor >Other transcription factor.
3184	HNRPD	heterogeneous nuclear ribonucleoprotein D (AU-rich element RNA binding protein 1, 37kDa)		transcription|regulation of transcription, DNA-dependent|RNA processing|RNA catabolic process|mRNA catabolic process	nucleotide binding|nucleic acid binding|DNA binding|RNA binding|mRNA binding|protein binding|transcription activator activity	chromosome, telomeric region|nucleus|chromosome|cytoplasm|ribonucleoprotein complex	RNA-BINDING PROTEIN	HETEROGENEOUS NUCLEAR RIBONUCLEOPROTEIN	Nucleic acid binding >Ribonucleoprotein.
9547	CXCL14	chemokine (C-X-C motif) ligand 14	Y	chemotaxis|inflammatory response|immune response|signal transduction|cell-cell signaling	chemokine activity	extracellular region|extracellular space|Golgi apparatus	FAMILY NOT NAMED		Molecular function unclassified.
8648	NCOA1	nuclear receptor coactivator 1		regulation of transcription, DNA-dependent|signal transduction|androgen receptor signaling pathway|positive regulation of transcription, DNA-dependent	transcription coactivator activity|transcription coactivator activity|histone acetyltransferase activity|signal transducer activity|receptor activity|acyltransferase activity|transferase activity|transcription regulator activity|nuclear hormone receptor binding|androgen receptor binding	nucleus|nucleus	NUCLEAR RECEPTOR COACTIVATOR	NUCLEAR RECEPTOR COACTIVATOR 1	Transcription factor. Transferase >Acetyltransferase.
5311	PKD2	polycystic kidney disease 2 (autosomal dominant)	Y	cation transport|calcium ion transport|cellular calcium ion homeostasis|cell cycle arrest|cell-matrix adhesion|JAK-STAT cascade|determination of left/right symmetry|organ morphogenesis|detection of mechanical stimulus during sensory perception	ion channel activity|voltage-gated chloride channel activity|voltage-gated sodium channel activity|calcium ion binding|protein C-terminus binding|cytoskeletal protein binding	plasma membrane|cilium|basal body|actin cytoskeleton|integral to membrane	POLYCYSTIN-RELATED	POLYCYSTIN 2 (PKD2)	Ion channel.
59067	IL21	interleukin 21	Y	signal transduction|positive regulation of T cell proliferation|positive regulation of interferon-gamma biosynthetic process|cell maturation	interleukin-2 receptor binding	extracellular space	FAMILY NOT NAMED		Molecular function unclassified.
4939	OAS2	2'-5'-oligoadenylate synthetase 2, 69/71kDa	Y	nucleobase, nucleoside, nucleotide and nucleic acid metabolic process|RNA catabolic process|immune response	2'-5'-oligoadenylate synthetase activity|RNA binding|ATP binding|transferase activity	mitochondrion|endoplasmic reticulum|microsome|membrane	(2-5)OLIGOADENYLATE SYNTHETASE	(2-5)OLIGOADENYLATE SYNTHETASE 2	Nucleic acid binding. Synthase and synthetase >Synthetase. Transferase >Nucleotidyltransferase. Defense/immunity protein.
3064	HD	huntingtin (Huntington disease)	Y	apoptosis|anti-apoptosis|induction of apoptosis|behavior|pathogenesis|organ morphogenesis|anterior/posterior pattern formation|vesicle transport along microtubule|paraxial mesoderm formation	transcription corepressor activity|transporter activity|protein binding|microtubule binding	soluble fraction|nucleus|cytoplasm|Golgi apparatus|cytoplasmic membrane-bound vesicle|inclusion body	HUNTINGTIN	HUNTINGTIN	Molecular function unclassified.
1244	ABCC2	ATP-binding cassette, sub-family C (CFTR/MRP), member 2	Y	transport	nucleotide binding|transporter activity|ATP binding|organic anion transmembrane transporter activity|ATPase activity|ATPase activity, coupled to transmembrane movement of substances	integral to plasma membrane|membrane	ATP-BINDING CASSETTE TRANSPORTER	MULTIDRUG RESISTANCE PROTEIN 2 (ATP-BINDING CASSETTE PROTEIN C)	Transporter >ATP-binding cassette (ABC) transporter.
89845	ABCC10	ATP-binding cassette, sub-family C (CFTR/MRP), member 10	N	transport	nucleotide binding|ATP binding|ATPase activity|ATPase activity, coupled to transmembrane movement of substances	membrane|integral to membrane	ATP-BINDING CASSETTE TRANSPORTER	MULTIDRUG RESISTANCE-ASSOCIATED PROTEIN 7	Transporter >ATP-binding cassette (ABC) transporter.
6717	SRI	sorcin	Y	regulation of action potential|transport|intracellular sequestering of iron ion|regulation of striated muscle contraction|signal transduction|heart development|muscle development|regulation of heart contraction	receptor binding|calcium channel regulator activity|calcium ion binding	intracellular|cytoplasm|plasma membrane	CALPAIN	SORCIN	Miscellaneous function >Transmembrane receptor regulatory/adaptor protein.
10008	KCNE3	potassium voltage-gated channel, Isk-related family, member 3	Y	ion transport|potassium ion transport	voltage-gated ion channel activity|voltage-gated potassium channel activity|potassium ion binding	voltage-gated potassium channel complex|membrane|integral to membrane	MINIMUM POTASSIUM ION CHANNEL-RELATED PEPTIDE 2	MINIMUM POTASSIUM ION CHANNEL-RELATED PEPTIDE 2 (MIRP2)	Ion channel >Voltage-gated ion channel >Voltage-gated potassium channel.
2776	GNAQ	guanine nucleotide binding protein (G protein), q polypeptide	Y	skeletal development|regulation of action potential|protein amino acid ADP-ribosylation|signal transduction|G-protein coupled receptor protein signaling pathway|G-protein signaling, adenylate cyclase activating pathway|phospholipase C activation|glutamate signaling pathway|heart development|blood coagulation|neuron remodeling|embryonic digit morphogenesis|regulation of melanocyte differentiation|…	nucleotide binding|GTPase activity|signal transducer activity|GTP binding	cytoplasm|heterotrimeric G-protein complex|plasma membrane	GTP-BINDING PROTEIN ALPHA SUBUNIT	GUANINE NUCLEOTIDE-BINDING PROTEIN G(Q), ALPHA SUBUNIT	Select regulatory molecule >G-protein >Large G-protein.
1875	E2F5	E2F transcription factor 5, p130-binding	Y	regulation of progression through cell cycle|transcription|regulation of transcription, DNA-dependent|organ morphogenesis	transcription factor activity|protein binding	nucleus|transcription factor complex|cytoplasm	E2F	E2F4	Transcription factor >Other transcription factor. Nucleic acid binding.
9530	BAG4	BCL2-associated athanogene 4	Y	protein folding|apoptosis|anti-apoptosis	receptor signaling protein activity|protein binding	cytoplasm	BCL2-ASSOCIATED ATHANOGENE	BCL2-ASSOCIATED ATHANOGENE 4	Chaperone.
3834	KIF25	kinesin family member 25	Y	mitotic sister chromatid segregation|organelle organization and biogenesis|microtubule-based movement	nucleotide binding|microtubule motor activity|ATP binding	kinesin complex|microtubule	KINESIN HEAVY CHAIN	KINESIN-LIKE PROTEIN KIF25	Cytoskeletal protein >Microtubule family cytoskeletal protein >Microtubule binding motor protein.
341370	LOC341370		Y
1545	CYP1B1	cytochrome P450, family 1, subfamily B, polypeptide 1	Y	electron transport|electron transport|visual perception	monooxygenase activity|monooxygenase activity|iron ion binding|protein binding|oxygen binding|heme binding|heme binding|metal ion binding|unspecific monooxygenase activity	endoplasmic reticulum|microsome|membrane	CYTOCHROME P450	CYTOCHROME P450, SUBFAMILY 1B1	Oxidoreductase >Oxygenase.
157574	FBXO16	F-box protein 16	Y	ubiquitin cycle			F-BOX AND WD40 DOMAIN PROTEIN	SULFUR METABOLITE REPRESSION CONTROL PROTEIN	Miscellaneous function >Other miscellaneous function protein.
8518	IKBKAP	inhibitor of kappa light polypeptide gene enhancer in B-cells, kinase complex-associated protein	Y	transcription|regulation of transcription from RNA polymerase II promoter|protein complex assembly|protein amino acid phosphorylation|immune response	signal transducer activity|protein binding|phosphorylase kinase regulator activity|kinase activity	cytoplasm|transcription elongation factor complex	IKAPPAB KINASE COMPLEX-ASSOCIATED PROTEIN		Select regulatory molecule >Kinase modulator >Kinase activator.
23341	DNAJC16	DnaJ (Hsp40) homolog, subfamily C, member 16	N	protein folding	heat shock protein binding|unfolded protein binding	membrane|integral to membrane	DNAJ/HSP40	DNAJ-RELATED	Chaperone >Other chaperones.
3581	IL9R	interleukin 9 receptor	N	signal transduction|cell proliferation	receptor activity|hematopoietin/interferon-class (D200-domain) cytokine receptor activity|interleukin-9 receptor activity	extracellular space|integral to plasma membrane|membrane	CYTOKINE RECEPTOR	INTERLEUKIN-9 RECEPTOR	Receptor >Cytokine receptor >Interleukin receptor.
85481	PSKH2	protein serine kinase H2	Y	protein amino acid phosphorylation	nucleotide binding|protein serine/threonine kinase activity|ATP binding|transferase activity		CALCIUM/CALMODULIN-DEPENDENT PROTEIN KINASE-RELATED	SERINE/THREONINE KINASE PSKH	Kinase >Protein kinase >Non-receptor serine/threonine protein kinase.
79872	CBLL1	Cas-Br-M (murine) ecotropic retroviral transforming sequence-like 1	Y	ubiquitin cycle|negative regulation of cell adhesion|positive regulation of cell migration|positive regulation of endocytosis	ubiquitin-protein ligase activity|protein binding|zinc ion binding|ligase activity|metal ion binding	intracellular	E-CADHERIN BINDING PROTEIN E7-RELATED		Ligase >Other ligase.
11201	POLI	polymerase (DNA directed) iota	Y	DNA replication|DNA repair	magnesium ion binding|DNA binding|iota DNA polymerase activity|transferase activity	intracellular|nucleus|nucleoplasm	DNA REPAIR POLYMERASE UMUC / TRANSFERASE FAMILY MEMBER	DNA POLYMERASE IOTA	Nucleic acid binding.
1674	DES	desmin	Y	muscle contraction|cytoskeleton organization and biogenesis|regulation of heart contraction	structural constituent of cytoskeleton|protein binding	insoluble fraction|cytoplasm|cytoskeleton|intermediate filament|Z disc|sarcolemma|contractile fiber|synapse	INTERMEDIATE FILAMENT	DESMIN	Cytoskeletal protein >Intermediate filament. Miscellaneous function >Structural protein.
79697	C14orf169	chromosome 14 open reading frame 169		transcription|regulation of transcription, DNA-dependent|chromatin modification			MINA53 (MYC INDUCED NUCLEAR ANTIGEN)		Molecular function unclassified.
284021	C17orf60	chromosome 17 open reading frame 60	Y				IMMUNOGLOBULIN FC RECEPTOR	IMMUNOGLOBULIN FC RECEPTOR RELATED	Receptor >Immunoglobulin receptor family member. Defense/immunity protein >Immunoglobulin receptor family member.
64241	ABCG8	ATP-binding cassette, sub-family G (WHITE), member 8 (sterolin 2)	Y	transport	ATP binding|ATPase activity	membrane|integral to membrane	ATP-BINDING CASSETTE TRANSPORTER	ATP-BINDING CASSETTE, SUB-FAMILY G, MEMBER 8 (STEROLIN-2) (ABCG8)	Transporter.
7023	TFAP4	transcription factor AP-4 (activating enhancer binding protein 4)		regulation of transcription from RNA polymerase II promoter|multicellular organismal development|regulation of transcription	RNA polymerase II transcription factor activity, enhancer binding|transcription coactivator activity|transcription regulator activity	nucleus	BASIC HELIX-LOOP-HELIX ZIP TRANSCRIPTION FACTOR	ACTIVATOR PROTEIN 4 (AP4)	Transcription factor >Basic helix-loop-helix transcription factor. Nucleic acid binding.
5290	PIK3CA	phosphoinositide-3-kinase, catalytic, alpha polypeptide	Y	glucose metabolic process|protein amino acid phosphorylation|anti-apoptosis|signal transduction|regulation of body size|protein kinase B signaling cascade	inositol or phosphatidylinositol kinase activity|1-phosphatidylinositol-3-kinase activity|transferase activity|insulin receptor substrate binding|phosphatidylinositol-4,5-bisphosphate 3-kinase activity	phosphoinositide 3-kinase complex|lamellipodium	PHOSPHATIDYLINOSITOL KINASE	PHOSPHATIDYLINOSITOL-4,5-BISPHOSPHATE 3-KINASE CATALYTIC SUBUNIT	Kinase >Other kinase.
7082	TJP1	tight junction protein 1 (zona occludens 1)	Y	intercellular junction assembly	protein binding|protein binding	membrane fraction|septate junction|tight junction|tight junction|membrane|basolateral plasma membrane|cell junction	TIGHT JUNCTION PROTEIN	TIGHT JUNCTION PROTEIN ZO-1	Cell junction protein >Tight junction.
7200	TRH	thyrotropin-releasing hormone	Y	signal transduction|cell-cell signaling|adult walking behavior|hormone-mediated signaling	neuropeptide hormone activity|protein binding|thyrotropin-releasing hormone activity	extracellular region|soluble fraction	No PANTHER hit		Molecular function unclassified.
23315	SLC9A8	solute carrier family 9 (sodium/hydrogen exchanger), member 8	Y	ion transport|sodium ion transport|regulation of pH	antiporter activity|solute:hydrogen antiporter activity|sodium:hydrogen antiporter activity	integral to membrane	SODIUM/HYDROGEN EXCHANGER	SODIUM/HYDROGEN EXCHANGER 5, 6, 8 (NHE5, NHE6, NHE8)	Transporter >Cation transporter.
63923	TNN	tenascin N	Y	cell-matrix adhesion|signal transduction|axonogenesis|cell growth|cell migration	molecular_function|integrin binding|identical protein binding	cellular_component|proteinaceous extracellular matrix|cell surface	FIBRINOGEN AND FIBRONECTIN	TENASCIN N, W	Cell adhesion molecule. Extracellular matrix >Extracellular matrix glycoprotein.
55251	PCMTD2	protein-L-isoaspartate (D-aspartate) O-methyltransferase domain containing 2	N	protein modification process	protein-L-isoaspartate (D-aspartate) O-methyltransferase activity	cytoplasm	PROTEIN-L-ISOASPARTATE O-METHYLTRANSFERASE		Transferase >Methyltransferase.
28982	FLVCR1	feline leukemia virus subgroup C cellular receptor 1	Y	transport|multicellular organismal development	receptor activity|transporter activity	integral to plasma membrane|membrane	FELINE LEUKEMIA VIRUS SUBGROUP C RECEPTOR-RELATED		Transporter >Other transporter.
55294	FBXW7	F-box and WD repeat domain containing 7	Y	protein ubiquitination	protein binding		F-BOX AND WD40 DOMAIN PROTEIN	F-BOX AND WD40 DOMAIN PROTEIN 7 (FBW7)	Ligase >Ubiquitin-protein ligase. Miscellaneous function >Other miscellaneous function protein.
3015	H2AFZ	H2A histone family, member Z	Y	nucleosome assembly|chromosome organization and biogenesis (sensu Eukaryota)	DNA binding	nucleosome|nucleus|chromosome	HISTONE H2A		Nucleic acid binding >Histone.
8481	OFD1	oral-facial-digital syndrome 1	Y	biological_process	molecular_function	cellular_component|cytoplasm	No PANTHER hit		Molecular function unclassified.
3003	GZMK	granzyme K (granzyme 3 tryptase II)	Y	proteolysis	serine-type endopeptidase activity	cytoplasm	SERINE PROTEASE-RELATED	GRANZYME K	Protease >Serine protease.
3320	HSP90AA1	heat shock protein 90kDa alpha (cytosolic), class A member 1	Y	protein folding|mitochondrial transport|response to unfolded protein|signal transduction|biological_process|protein refolding|positive regulation of nitric oxide biosynthetic process	nucleotide binding|molecular_function|ATP binding|ATP binding|nitric-oxide synthase regulator activity|TPR domain binding|TPR domain binding|protein homodimerization activity|unfolded protein binding	cellular_component|cytoplasm|cytosol	HEAT SHOCK PROTEIN 90		Chaperone >Hsp 90 family chaperone.
11146	GLMN	glomulin, FKBP associated protein	Y	vasculogenesis|regulation of gene expression, epigenetic|negative regulation of T cell proliferation|positive regulation of phosphorylation|muscle cell differentiation|positive regulation of interleukin-2 biosynthetic process|positive regulation of cytokine secretion	hepatocyte growth factor receptor binding|protein binding|protein binding	intracellular	FKBP-ASSOCIATED PROTEIN		Signaling molecule. Miscellaneous function >Structural protein. Miscellaneous function >Other miscellaneous function protein.
402037	LOC402037		N
84084	RAB6C	RAB6C, member RAS oncogene family	Y	small GTPase mediated signal transduction|protein transport|response to drug	nucleotide binding|GTPase activity|GTP binding	intracellular	RAS-RELATED GTPASE	RAS-RELATED PROTEIN RAB-6	Select regulatory molecule >G-protein >Small GTPase.
6121	RPE65	retinal pigment epithelium-specific protein 65kDa	Y	regulation of rhodopsin gene activity|visual perception|retinal metabolic process|response to stimulus	protein binding	cytoplasm|membrane	CARTENOID OXYGENASE	RETINAL PIGMENT EPITHELIUM	Oxidoreductase >Oxygenase.
11012	KLK11	kallikrein-related peptidase 11	Y	proteolysis	serine-type endopeptidase activity|peptidase activity	extracellular region	SERINE PROTEASE-RELATED	KALLIKREIN 11	Protease >Serine protease.
340571	LOC340571	seven in absentia homolog 1 (Drosophila) pseudogene	N	ubiquitin-dependent protein catabolic process|multicellular organismal development	protein binding|zinc ion binding|metal ion binding	nucleus
79142	PHF23	PHD finger protein 23	N		protein binding|zinc ion binding|metal ion binding		UNCHARACTERIZED	SUBFAMILY NOT NAMED	Molecular function unclassified.
11197	WIF1	WNT inhibitory factor 1	N	signal transduction|cell-cell signaling|multicellular organismal development|Wnt receptor signaling pathway	protein-tyrosine kinase activity		EGF-LIKE DOMAIN PROTEIN	WNT INHIBITORY FACTOR-1	Signaling molecule >Other signaling molecule.
1135	CHRNA2	cholinergic receptor, nicotinic, alpha 2 (neuronal)	N	ion transport|signal transduction|synaptic transmission	nicotinic acetylcholine-activated cation-selective channel activity|ion channel activity|extracellular ligand-gated ion channel activity|acetylcholine receptor activity	nicotinic acetylcholine-gated receptor-channel complex|integral to membrane|cell junction|synapse|postsynaptic membrane	NEUROTRANSMITTER GATED ION CHANNEL	NEURONAL ACETYLCHOLINE RECEPTOR PROTEIN ALPHA 2 MAMMAL	Receptor >Ligand-gated ion channel >Acetylcholine receptor. Ion channel >Ligand-gated ion channel >Acetylcholine receptor.
9427	ECEL1	endothelin converting enzyme-like 1	N	proteolysis|neuropeptide signaling pathway	neprilysin activity|metallopeptidase activity|zinc ion binding|metal ion binding	integral to plasma membrane|membrane	ZINC METALLOPROTEASE FAMILY M13 NEPRILYSIN-RELATED	ENDOTHELIN-CONVERTING ENZYME-LIKE 1 (DAMAGE-INDUCED NEURONAL ENDOPEPTIDASE)	Protease >Metalloprotease.
493	ATP2B4	ATPase, Ca++ transporting, plasma membrane 4	Y	cation transport|calcium ion transport|metabolic process	nucleotide binding|magnesium ion binding|calcium-transporting ATPase activity|calcium ion binding|calmodulin binding|ATP binding|hydrolase activity|hydrolase activity, acting on acid anhydrides, catalyzing transmembrane movement of substances	plasma membrane|integral to plasma membrane	CATION-TRANSPORTING ATPASE	PLASMA MEMBRANE CALCIUM-TRANSPORTING ATPASE 4 (PMCA4) (PLASMA MEMBRANE CALCIUM PUMP ISOFORM 4)	Ion channel. Transporter >Cation transporter. Hydrolase >Other hydrolase.
166785	MMAA	methylmalonic aciduria (cobalamin deficiency) cblA type	N		nucleotide binding|ATP binding|nucleoside-triphosphatase activity	mitochondrion	METHYLMALONYL-COA MUTASE		Molecular function unclassified.
124222	PAQR4	progestin and adipoQ receptor family member IV	N		receptor activity	membrane|integral to membrane	ADIPOR/PROGESTIN RECEPTOR-RELATED	PROGESTIN AND ADIPOQ RECEPTOR FAMILY MEMBER IV	Receptor.
3759	KCNJ2	potassium inwardly-rectifying channel, subfamily J, member 2	N	ion transport|potassium ion transport	inward rectifier potassium channel activity|voltage-gated ion channel activity|protein binding|potassium ion binding	integral to plasma membrane|membrane	INWARD RECTIFIER POTASSIUM CHANNEL	INWARD RECTIFIER POTASSIUM CHANNEL 2 (KIR2.1)(IRK1)	Ion channel >Voltage-gated ion channel >Voltage-gated potassium channel.
50939	IMPG2	interphotoreceptor matrix proteoglycan 2	N	visual perception	extracellular matrix structural constituent|hyaluronic acid binding	proteinaceous extracellular matrix	INTERPHOTORECEPTOR MATRIX PROTEOGLYCAN	INTERPHOTORECEPTOR MATRIX PROTEOGLYCAN 200	Receptor. Extracellular matrix >Extracellular matrix glycoprotein.
6102	RP2	retinitis pigmentosa 2 (X-linked recessive)	N	GTP biosynthetic process|UTP biosynthetic process|CTP biosynthetic process|beta-tubulin folding|visual perception|response to stimulus	nucleoside diphosphate kinase activity|ATP binding|unfolded protein binding	membrane	XRP2 PROTEIN		Kinase >Nucleotide kinase.
3688	ITGB1	integrin, beta 1 (fibronectin receptor, beta polypeptide, antigen CD29 includes MDF2, MSK12)	Y	cellular defense response|cell adhesion|homophilic cell adhesion|cell-matrix adhesion|integrin-mediated signaling pathway|multicellular organismal development|cell migration	receptor activity|binding|protein binding|identical protein binding|protein heterodimerization activity	ruffle|endoplasmic reticulum|integrin complex|integrin complex|membrane|integral to membrane	INTEGRIN BETA SUBUNIT	INTEGRIN BETA 1	Receptor >Other receptor. Cell adhesion molecule.
9134	CCNE2	cyclin E2	Y	regulation of progression through cell cycle|cell cycle checkpoint|regulation of cyclin-dependent protein kinase activity|DNA replication initiation|cell cycle|cell division	protein binding|cyclin-dependent protein kinase regulator activity	nucleus	CYCLINS	CYCLIN E	Select regulatory molecule >Kinase modulator >Kinase activator.
10857	PGRMC1	progesterone receptor membrane component 1	N		receptor activity|steroid binding|protein binding|lipid binding|heme binding|transition metal ion binding	endoplasmic reticulum|microsome|integral to plasma membrane|cell surface|membrane	MEMBRANE ASSOCIATED PROGESTERONE RECEPTOR-RELATED	MEMBRANE ASSOCIATED PROGESTERONE RECEPTOR	Receptor.
157724	SLC7A13	solute carrier family 7, (cationic amino acid transporter, y+ system) member 13	N	transport|amino acid transport	amino acid transmembrane transporter activity	membrane|integral to membrane	AMINO ACID TRANSPORTER	AMINO ACID TRANSPORTER 1	Transporter >Amino acid transporter.
80086	TUBA4B	tubulin, alpha 4b (pseudogene)	Y	microtubule-based movement|protein polymerization	nucleotide binding|GTPase activity|structural molecule activity|GTP binding	microtubule|protein complex
7737	RNF113A	ring finger protein 113A	N	multicellular organismal development	nucleic acid binding|protein binding|zinc ion binding|metal ion binding		ZINC FINGER PROTEIN 183		Nucleic acid binding. Ligase >Ubiquitin-protein ligase.
6357	CCL13	chemokine (C-C motif) ligand 13	Y	cellular calcium ion homeostasis|chemotaxis|inflammatory response|immune response|signal transduction|cell-cell signaling	signal transducer activity|chemokine receptor activity|chemokine activity	extracellular region|extracellular space|membrane	SMALL INDUCIBLE CYTOKINE A	SMALL INDUCIBLE CYTOKINE A	Signaling molecule >Chemokine.
29929	ALG6	asparagine-linked glycosylation 6 homolog (S. cerevisiae, alpha-1,3-glucosyltransferase)	Y	protein amino acid N-linked glycosylation	oligosaccharyl transferase activity|transferase activity, transferring glycosyl groups|glucosyltransferase activity	endoplasmic reticulum|membrane|integral to membrane	DOLICHYL GLYCOSYLTRANSFERASE		Transferase >Glycosyltransferase.
1633	DCK	deoxycytidine kinase	N	nucleobase, nucleoside, nucleotide and nucleic acid metabolic process|pyrimidine nucleotide metabolic process	nucleotide binding|deoxycytidine kinase activity|ATP binding|kinase activity|transferase activity|phosphotransferase activity, alcohol group as acceptor		DEOXYNUCLEOSIDE KINASE FAMILY PROTEIN	DEOXYCYTIDINE KINASE	Kinase >Nucleotide kinase.
79908	BTNL8	butyrophilin-like 8	N			membrane|integral to membrane	RING FINGER-CONTAINING PROTEIN-RELATED	BUTYROPHILIN-LIKE PROTEIN 3,8	Molecular function unclassified.
57498	KIDINS220	kinase D-interacting substrate of 220 kDa	Y				ANKYRIN REPEAT-CONTAINING	ANKYRIN REPEAT-RICH MEMBRANE-SPANNING PROTEIN	Molecular function unclassified.
6476	SI	sucrase-isomaltase (alpha-glucosidase)	N	carbohydrate metabolic process|metabolic process	hydrolase activity, hydrolyzing O-glycosyl compounds|oligo-1,6-glucosidase activity|sucrose alpha-glucosidase activity	Golgi apparatus|brush border|membrane|integral to membrane	ALPHA-GLUCOSIDASE	SUCRASE-ISOMALTASE	Hydrolase >Glucosidase.
4321	MMP12	matrix metallopeptidase 12 (macrophage elastase)	Y	peptidoglycan metabolic process|proteolysis|cell motility	macrophage elastase activity|calcium ion binding|zinc ion binding	proteinaceous extracellular matrix	MATRIX METALLOPROTEINASE	MATRIX METALLOPROTEINASE 12, MMP12	Protease >Metalloprotease. Extracellular matrix >Other extracellular matrix.
84168	ANTXR1	anthrax toxin receptor 1	N		receptor activity|protein binding|metal ion binding	membrane|integral to membrane	ANTHROX TOXIN RECEPTOR PROTEIN (ANTXR)		Receptor >Other receptor.
133	ADM	adrenomedullin	N	cAMP biosynthetic process|progesterone biosynthetic process|signal transduction|cell-cell signaling|heart development|female pregnancy|excretion|circulation|positive regulation of cell proliferation|response to wounding	hormone activity	extracellular region|extracellular space|soluble fraction	ADRENOMEDULLIN, ADM		Signaling molecule >Peptide hormone. Miscellaneous function >Other miscellaneous function protein.
10156	RASA4	RAS p21 protein activator 4	N	intracellular signaling cascade|regulation of small GTPase mediated signal transduction	GTPase activator activity|zinc ion binding|metal ion binding	intracellular|cytoplasm|membrane	RAS GTPASE-ACTIVATING PROTEINS	RAS GTPASE ACTIVATING PROTEIN 4	Select regulatory molecule >G-protein modulator >Other G-protein modulator.
7181	NR2C1	nuclear receptor subfamily 2, group C, member 1		negative regulation of transcription from RNA polymerase II promoter|transcription|regulation of transcription, DNA-dependent	transcription factor activity|steroid hormone receptor activity|steroid hormone receptor activity|protein binding|zinc ion binding|transcription repressor activity|protein homodimerization activity|histone deacetylase binding|sequence-specific DNA binding|metal ion binding	nucleus	NUCLEAR HORMONE RECEPTOR	DEVELOPMENTAL ORPHAN RECEPTOR 2 (DOR2)	Receptor >Nuclear hormone receptor. Transcription factor >Nuclear hormone receptor. Nucleic acid binding.
552	AVPR1A	arginine vasopressin receptor 1A	Y	generation of precursor metabolites and energy|signal transduction|G-protein coupled receptor protein signaling pathway|phospholipase C activation|elevation of cytosolic calcium ion concentration|circulation	rhodopsin-like receptor activity|receptor activity|vasopressin receptor activity|protein kinase C binding	endosome|plasma membrane|integral to plasma membrane	G-PROTEIN COUPLED RECEPTOR	VASOPRESSIN V1A RECPETOR	Receptor >G-protein coupled receptor.
79979	CXorf34	chromosome X open reading frame 34	Y		methyltransferase activity		RNA M5U METHYLTRANSFERASE FAMILY	RNA M5U METHYLTRANSFERASE	Nucleic acid binding >RNA methyltransferase. Transferase >Methyltransferase >RNA methyltransferase.
1577	CYP3A5	cytochrome P450, family 3, subfamily A, polypeptide 5	N	electron transport|steroid metabolic process	monooxygenase activity|iron ion binding|oxygen binding|heme binding|metal ion binding|unspecific monooxygenase activity	endoplasmic reticulum|microsome|membrane	CYTOCHROME P450	CYTOCHROME P450, SUBFAMILY 3A	Oxidoreductase >Oxygenase.
57184	C15orf17	chromosome 15 open reading frame 17	Y				No PANTHER hit		Molecular function unclassified.
6748	SSR4	signal sequence receptor, delta (translocon-associated protein delta)	Y	intracellular protein transport	calcium ion binding	endoplasmic reticulum|translocon complex|membrane|integral to membrane	TRANSLOCON-ASSOCIATED PROTEIN, DELTA SUBUNIT		Miscellaneous function >Other miscellaneous function protein.
8838	WISP3	WNT1 inducible signaling pathway protein 3	Y	regulation of cell growth|signal transduction|cell-cell signaling	insulin-like growth factor binding|growth factor activity	extracellular region|soluble fraction	CONNECTIVE TISSUE GROWTH FACTOR-RELATED	CONNECTIVE TISSUE GROWTH FACTOR WISP3/CCN6	Signaling molecule >Growth factor.
23625	FAM89B	family with sequence similarity 89, member B	N				MAMMARY TURMOR VIRUS RECEPTOR HOMOLOG 1, 2 (MTVR1, 2)		Receptor.
104	ADARB1	adenosine deaminase, RNA-specific, B1 (RED1 homolog rat)	Y	mRNA processing	double-stranded RNA binding|adenosine deaminase activity|zinc ion binding|hydrolase activity|metal ion binding	intracellular	EUKARYOTE SPECIFIC DSRNA BINDING PROTEIN	ADENOSINE DEAMINASE ACTING ON RNA (ADAR)-2	Nucleic acid binding. Hydrolase >Deaminase.
137202	OC90		Y
9867	PJA2	praja 2, RING-H2 motif containing	Y	ubiquitin cycle	protein binding|zinc ion binding|ligase activity|metal ion binding	cytoplasm|endoplasmic reticulum|membrane|cell junction|synapse	UBIQUITIN PROTEIN LIGASE PRAJA1 (EC 6.3.2.-) (RING FINGER PROTEIN 70)-RELATED	RING FINGER PROTEIN 131	Transcription factor.
3932	LCK	lymphocyte-specific protein tyrosine kinase	Y	regulation of progression through cell cycle|protein amino acid phosphorylation|protein amino acid phosphorylation|cellular zinc ion homeostasis|induction of apoptosis|caspase activation|intracellular signaling cascade|intracellular signaling cascade|Ras protein signal transduction|hemopoiesis|T cell differentiation|response to drug|positive regulation of T cell receptor signaling pathway|positiv…	nucleotide binding|glycoprotein binding|protein-tyrosine kinase activity|protein-tyrosine kinase activity|protein serine/threonine phosphatase activity|ATP binding|protein C-terminus binding|transferase activity|protein kinase binding|SH2 domain binding|CD4 receptor binding|CD8 receptor binding|phosphoinositide 3-kinase binding|ATPase binding	pericentriolar material|cytoplasm|plasma membrane|lipid raft	TYROSINE PROTEIN KINASE	PROTO-ONCOGENE TYROSINE-PROTEIN KINASE LCK	Kinase >Protein kinase >Non-receptor tyrosine protein kinase.
4942	OAT	ornithine aminotransferase (gyrate atrophy)	Y	amino acid metabolic process|ornithine metabolic process|visual perception	ornithine-oxo-acid transaminase activity|protein binding|transferase activity|pyridoxal phosphate binding	mitochondrion|mitochondrial matrix	AMINOTRANSFERASE CLASS III	ORNITHINE AMINOTRANSFERASE	Transferase >Transaminase.
6539	SLC6A12	solute carrier family 6 (neurotransmitter transporter, betaine/GABA), member 12	Y	neurotransmitter transport	neurotransmitter:sodium symporter activity|gamma-aminobutyric acid:sodium symporter activity|symporter activity	integral to plasma membrane|membrane	SODIUM/CHLORIDE DEPENDENT TRANSPORTER	SODIUM- AND CHLORIDE-DEPENDENT BETAINE TRANSPORTER	Transporter >Other transporter.
5291	PIK3CB	phosphoinositide-3-kinase, catalytic, beta polypeptide	Y	regulation of progression through cell cycle|activation of MAPK activity|regulation of cell-matrix adhesion|cellular calcium ion homeostasis|chemotaxis|homophilic cell adhesion|signal transduction|G-protein coupled receptor protein signaling pathway|platelet activation|embryonic cleavage	inositol or phosphatidylinositol kinase activity|1-phosphatidylinositol-3-kinase activity|transferase activity|insulin receptor substrate binding|phosphatidylinositol-4,5-bisphosphate 3-kinase activity	phosphoinositide 3-kinase complex	PHOSPHATIDYLINOSITOL KINASE	PHOSPHATIDYLINOSITOL-4,5-BISPHOSPHATE 3-KINASE CATALYTIC SUBUNIT	Kinase >Other kinase.
3682	ITGAE	integrin, alpha E (antigen CD103, human mucosal lymphocyte antigen 1 alpha polypeptide)	Y	cell adhesion|leukocyte adhesion|integrin-mediated signaling pathway	magnesium ion binding|receptor activity|calcium ion binding|protein binding	integrin complex|membrane|integral to membrane	INTEGRIN ALPHA	INTEGRIN ALPHA-E	Cell adhesion molecule >Other cell adhesion molecule.
3667	IRS1	insulin receptor substrate 1	Y	signal transduction|insulin receptor signaling pathway|insulin-like growth factor receptor signaling pathway	signal transducer activity|transmembrane receptor protein tyrosine kinase docking protein activity|insulin receptor binding|insulin-like growth factor receptor binding|protein binding|protein kinase binding|SH2 domain binding|phosphoinositide 3-kinase binding|phosphoinositide 3-kinase binding	nucleus|cytoplasm|microsome	INSULIN RECEPTOR SUBSTRATE	INSULIN RECEPTOR SUBSTRATE-1	Miscellaneous function >Other miscellaneous function protein.
2002	ELK1	ELK1, member of ETS oncogene family		transcription|regulation of transcription, DNA-dependent|positive regulation of transcription from RNA polymerase II promoter	transcription factor activity|transcription factor activity|protein binding|sequence-specific DNA binding	nucleus|nucleus	ETS	ELK1	Signaling molecule >Other signaling molecule. Transcription factor >Other transcription factor.
7098	TLR3	toll-like receptor 3	Y	inflammatory response|hyperosmotic response|signal transduction|activation of NF-kappaB-inducing kinase|detection of virus|defense response to bacterium|positive regulation of I-kappaB kinase/NF-kappaB cascade|positive regulation of interferon-gamma biosynthetic process|innate immune response|positive regulation of interferon-alpha biosynthetic process|positive regulation of interferon-beta biosy…	double-stranded RNA binding|double-stranded RNA binding|transmembrane receptor activity|protein binding	integral to plasma membrane|membrane	LEUCINE-RICH TRANSMEMBRANE PROTEINS	TOLL-LIKE RECEPTOR-3	Receptor. Extracellular matrix.
330	BIRC3	baculoviral IAP repeat-containing 3	Y	anti-apoptosis|cell surface receptor linked signal transduction|regulation of apoptosis	ubiquitin-protein ligase activity|protein binding|zinc ion binding|metal ion binding	intracellular|nucleus|cytoplasm	INHIBITOR OF APOPTOSIS	INHIBITOR OF APOPTOSIS PROTEIN 1 AND 2, IAP1, IAP2	Select regulatory molecule >Protease inhibitor.
3452	IFNA21	interferon, alpha 21	Y	defense response|response to virus	hematopoietin/interferon-class (D200-domain) cytokine receptor binding	extracellular region|extracellular space	TYPE I INTERFERON	INTERFERON ALPHA	Signaling molecule >Cytokine >Interferon.
353376	TICAM2	toll-like receptor adaptor molecule 2	Y	transport|positive regulation of I-kappaB kinase/NF-kappaB cascade	signal transducer activity|transmembrane receptor activity|protein binding	membrane|integral to membrane	COPII-COATED VESICLE MEMBRANE PROTEIN	TIR DOMAIN CONTAINING ADAPTOR INDUCING INTERFERON-BETA	Transfer/carrier protein. Membrane traffic protein >Vesicle coat protein.
64149	C17orf75	chromosome 17 open reading frame 75	Y	spermatogenesis	molecular_function	cellular_component	No PANTHER hit		Molecular function unclassified.
51135	IRAK4	interleukin-1 receptor-associated kinase 4	N	protein amino acid phosphorylation	nucleotide binding|magnesium ion binding|protein serine/threonine kinase activity|protein-tyrosine kinase activity|receptor activity|protein binding|protein binding|ATP binding|kinase activity|transferase activity		SERINE-THREONINE PROTEIN KINASE, PLANT-TYPE	INTERLEUKIN-1 RECEPTOR-ASSOCIATED KINASE-4	Receptor >Protein kinase receptor >Serine/threonine protein kinase receptor. Kinase >Protein kinase >Serine/threonine protein kinase receptor. Kinase >Protein kinase >Non-receptor serine/threonine protein kinase.
7298	TYMS	thymidylate synthetase	Y	nucleobase, nucleoside, nucleotide and nucleic acid metabolic process|dTMP biosynthetic process|DNA replication|DNA repair|deoxyribonucleoside monophosphate biosynthetic process|nucleotide biosynthetic process|phosphoinositide-mediated signaling	thymidylate synthase activity|methyltransferase activity|transferase activity		DIHYDROFOLATE REDUCTASE	BIFUNCTIONAL DIHYDROFOLATE REDUCTASE-THYMIDYLATE SYNTHASE	Synthase and synthetase >Synthase. Transferase >Methyltransferase.
9531	BAG3	BCL2-associated athanogene 3	N	protein folding|apoptosis|anti-apoptosis	protein binding|Hsp70/Hsc70 protein regulator activity	cellular_component|cytosol	BCL2-ASSOCIATED ATHANOGENE	BCL2-ASSOCIATED ATHANOGENE 3	Chaperone.
145226	RDH12	retinol dehydrogenase 12 (all-trans/9-cis/11-cis)	N	metabolic process|retinol metabolic process|photoreceptor cell maintenance|response to stimulus	retinol dehydrogenase activity|oxidoreductase activity	intracellular	SHORT-CHAIN DEHYDROGENASES/REDUCTASE FAMILY MEMBER	RETINOL DEHYDROGENASE	Oxidoreductase >Dehydrogenase. Oxidoreductase >Reductase.
3633	INPP5B	inositol polyphosphate-5-phosphatase, 75kDa	N	signal transduction|biological_process	phosphoinositide 5-phosphatase activity|inositol-polyphosphate 5-phosphatase activity|hydrolase activity	intracellular|integral to membrane	INOSITOL 5-PHOSPHATASE	OCRL TYPE II INOSITOL 5-PHOSPHATASE	Phosphatase >Other phosphatase.
6606	SMN1	survival of motor neuron 1, telomeric	N	spliceosome assembly|mRNA processing|RNA splicing	RNA binding|protein binding|protein binding	nucleus|spliceosome|cytoplasm|Cajal body	SURVIVAL MOTOR NEURON PROTEIN		Nucleic acid binding >Other RNA-binding protein. Nucleic acid binding >mRNA processing factor.
7363	UGT2B4	UDP glucuronosyltransferase 2 family, polypeptide B4	N	estrogen catabolic process|xenobiotic metabolic process|metabolic process	glucuronosyltransferase activity	endoplasmic reticulum|microsome|membrane|integral to membrane	GLUCOSYL/GLUCURONOSYL TRANSFERASES		Transferase >Glycosyltransferase.
4123	MAN2C1	mannosidase, alpha, class 2C, member 1	Y	carbohydrate metabolic process|mannose metabolic process|metabolic process	alpha-mannosidase activity|hydrolase activity, acting on glycosyl bonds		ALPHA-MANNOSIDASE	ALPHA-MANNOSIDASE 2C1 (ALPHA-D-MANNOSIDE MANNOHYDROLASE)	Hydrolase >Glycosidase.
5862	RAB2A	RAB2A, member RAS oncogene family	Y	ER to Golgi vesicle-mediated transport|small GTPase mediated signal transduction|protein transport	nucleotide binding|GTPase activity|GTP binding	endoplasmic reticulum|Golgi apparatus|membrane	RAS-RELATED GTPASE	RAS-RELATED PROTEIN RAB-2	Select regulatory molecule >G-protein >Small GTPase.
4703	NEB	nebulin	Y	somatic muscle development|regulation of actin filament length	actin binding|protein binding|structural constituent of muscle	cytoplasm|actin cytoskeleton|Z disc	NEBULIN	NEBULIN	Cytoskeletal protein >Actin binding cytoskeletal protein >Non-motor actin binding protein.
		red = not in secondary screen
		black = not confirmed in secondary screen
		green = confirmed in secondary screen
